# Supplementary material for: Alkaloids from the stems of Clausena lansium and their neuroprotective activity
Source: Royal Society of Chemistry journal article supplement (doi:10.1039/c7ra06753d), 2017-01-01

**Alkaloids from the Stems of *Clausena lansium* and their potential  
Neuroprotective Activity**

Jie Liu,<sup>1,2</sup> Yi-Qian Du,<sup>1</sup> Chuang-Jun Li,<sup>1</sup> Li Li,<sup>1</sup> Fang-you Chen<sup>1</sup>, Jing-Zhi Yang,<sup>1</sup>

Nai-Hong Chen,<sup>1</sup> and Dong-Ming Zhang<sup>1\*</sup>

<sup>1</sup> State Key Laboratory of Bioactive Substance and Function of Natural Medicines,  
Institute of Materia Medica, Chinese Academy of Medical Sciences and Peking Union  
Medical College, Beijing 100050, People's Republic of China;

<sup>2</sup> Beijing Research Institute of Chinese Medicine, Beijing University of Chinese  
Medicine, Beijing 100029, People's Republic of China

**Supporting information**

---

\*To whom correspondence should be addressed. Tel./Fax: +86-10-63165227. E-mail: [zhangdm@imm.ac.cn](mailto:zhangdm@imm.ac.cn).

## Index

|                                                                                                                                       |    |
|---------------------------------------------------------------------------------------------------------------------------------------|----|
| S1. The $^1\text{H}$ -NMR (400 MHz, $\text{DMSO-}d_6$ ) Spectrum of compound 1 .....                                                  | 4  |
| S2. The $^{13}\text{C}$ NMR Spectrum (100 MHz, $\text{DMSO-}d_6$ ) of Compound 1 .....                                                | 4  |
| S3. The DEPT Spectrum of compound 1 .....                                                                                             | 5  |
| S4. The HSQC Spectrum of Compound 1 .....                                                                                             | 5  |
| S5. The $^1\text{H}$ , $^1\text{H}$ -COSY Spectrum of compound 1 .....                                                                | 6  |
| S6. The HMBC Spectrum of compound 1 .....                                                                                             | 6  |
| S7. The NOE difference Spectrum of compound 1 .....                                                                                   | 7  |
| S8. The HRESIMS Spectrum of Compound 1 .....                                                                                          | 8  |
| S9. The IR Spectrum of Compound 1a .....                                                                                              | 9  |
| S10. The IR Spectrum of compound 1b .....                                                                                             | 9  |
| S11. The CD Spectrum of compound 1a .....                                                                                             | 10 |
| S12. The CD Spectrum of compound 1b .....                                                                                             | 10 |
| S13. The $^1\text{H}$ -NMR (600 MHz, $\text{DMSO-}d_6$ ) Spectrum of compound 1c .....                                                | 10 |
| S14. The $^{13}\text{C}$ NMR Spectrum (150 MHz, $\text{DMSO-}d_6$ ) of Compound 1c .....                                              | 12 |
| S15. The HSQC Spectrum of Compound 1c .....                                                                                           | 12 |
| S16. The $^1\text{H}$ , $^1\text{H}$ -COSY Spectrum of compound 1c .....                                                              | 13 |
| S17. The HMBC Spectrum of Compound 1c .....                                                                                           | 13 |
| S18. The NOE difference Spectrum of compound 1c .....                                                                                 | 14 |
| S19. The HREIMS Spectrum of compound 1c .....                                                                                         | 15 |
| S20. The IR Spectrum of Compound 1c .....                                                                                             | 16 |
| S21. The CD Spectrum of compound 1c .....                                                                                             | 16 |
| S22. The CD spectrum of compound 1c in a DMSO of dimolybdenum<br>tetraacetate (the inherent CD of the diol was subtracted) .....      | 17 |
| S23. The Calculated ECD spectra of (2'R, 3'R), (2'R, 3'S), (2'S, 3'R), (2'S, 3'S)-1c<br>and the experimental ECD spectrum of 1c ..... | 17 |
| S24. The $^1\text{H}$ NMR Spectrum (600 MHz, $\text{DMSO-}d_6$ ) of compound 2 .....                                                  | 19 |
| S25. The $^{13}\text{C}$ NMR Spectrum (150 MHz, $\text{DMSO-}d_6$ ) of compound 2 .....                                               | 20 |
| S26. The DEPT Spectrum of compound 2 .....                                                                                            | 21 |
| S27. The $^1\text{H}$ , $^1\text{H}$ -COSY Spectrum of compound 2 .....                                                               | 22 |
| S28. The HSQC Spectrum of compound 2 .....                                                                                            | 23 |

|                                                                                                                                                                                                             |    |
|-------------------------------------------------------------------------------------------------------------------------------------------------------------------------------------------------------------|----|
| S29. The HMBC Spectrum of compound 2 .....                                                                                                                                                                  | 24 |
| S30. The NOE Spectrum of compound 2 .....                                                                                                                                                                   | 24 |
| S31. The HRESIMS Spectrum of compound 2 .....                                                                                                                                                               | 25 |
| S32. The IR Spectrum of compound 2a .....                                                                                                                                                                   | 26 |
| S33. The IR Spectrum of compound 2b .....                                                                                                                                                                   | 27 |
| S34. The CD Spectrum of compound 2a .....                                                                                                                                                                   | 27 |
| S35. The CD Spectrum of compound 2b.....                                                                                                                                                                    | 28 |
| S36. Calculated ECD spectra of (2' <i>R</i> , 3' <i>S</i> ), (2' <i>S</i> , 3' <i>R</i> ), (2' <i>R</i> , 3' <i>R</i> ), (2' <i>S</i> , 3' <i>S</i> )-2 and the experimental ECD spectrum of 2a and 2b..... | 28 |
| S37. The <sup>1</sup> H NMR Spectrum (400 MHz, DMSO- <i>d</i> <sub>6</sub> ) of compound 3.....                                                                                                             | 30 |
| S38. The <sup>13</sup> C NMR Spectrum (100 MHz, DMSO- <i>d</i> <sub>6</sub> )of compound 3 .....                                                                                                            | 30 |
| S39. The DEPT Spectrum of compound 3 .....                                                                                                                                                                  | 31 |
| S40. The HSQC Spectrum of compound 3.....                                                                                                                                                                   | 32 |
| S41. The <sup>1</sup> H, <sup>1</sup> H-COSY Spectrum of compound 3 .....                                                                                                                                   | 33 |
| S42. The HMBC Spectrum of compound 3 .....                                                                                                                                                                  | 34 |
| S43. The NOESY Spectrum of compound 3 .....                                                                                                                                                                 | 35 |
| S44. The HRESIMS Spectrum of compound 3 .....                                                                                                                                                               | 36 |
| S45. The <sup>1</sup> H NMR Spectrum (600 MHz, CDCl <sub>3</sub> ) of compound 3aa .....                                                                                                                    | 37 |
| S46. The <sup>1</sup> H NMR Spectrum (600 MHz, CDCl <sub>3</sub> )of compound 3ab.....                                                                                                                      | 38 |
| S47. The Calculated ECD spectra of (3 <i>S</i> , 4 <i>R</i> , 5 <i>S</i> , 6 <i>S</i> ), (3 <i>R</i> , 4 <i>S</i> , 5 <i>R</i> , 6 <i>R</i> )-3 and the experimental ECD spectrum of 3a and 3b.....         | 38 |
| S48. The IR Spectrum of compound 3a .....                                                                                                                                                                   | 39 |
| S49. The IR Spectrum of compound 3b .....                                                                                                                                                                   | 40 |
| S50. The <sup>1</sup> H NMR Spectrum (600 MHz, DMSO- <i>d</i> <sub>6</sub> ) of compound 4 .....                                                                                                            | 41 |
| S51. The <sup>13</sup> C NMR Spectrum (150 MHz, DMSO- <i>d</i> <sub>6</sub> ) of compound 4 .....                                                                                                           | 41 |
| S52. The HRESIMS Spectrum of compound 4 .....                                                                                                                                                               | 42 |
| S53. The Calculated ECD spectra of (1' <i>R</i> , 2' <i>R</i> , 6' <i>R</i> ), (1' <i>S</i> , 2' <i>S</i> , 6' <i>S</i> )-isomers and the experimental ECD spectrum of 4a and 4b.....                       | 43 |
| S54. The <sup>1</sup> H NMR Spectrum (600 MHz, DMSO- <i>d</i> <sub>6</sub> ) of compound 5 .....                                                                                                            | 44 |
| S55. The <sup>13</sup> C NMR Spectrum (150 MHz, DMSO- <i>d</i> <sub>6</sub> ) of compound 5 .....                                                                                                           | 45 |
| S56. The HRESIMS Spectrum of compound 5 .....                                                                                                                                                               | 46 |
| S57. The Calculated ECD spectra of (1' <i>R</i> , 2' <i>R</i> ), (1' <i>S</i> , 2' <i>S</i> )-5 and the experimental ECD spectrum of 5a and 5b .....                                                        | 47 |

### S1. The $^1\text{H-NMR}$ (400 MHz, $\text{DMSO-}d_6$ ) Spectrum of compound 1

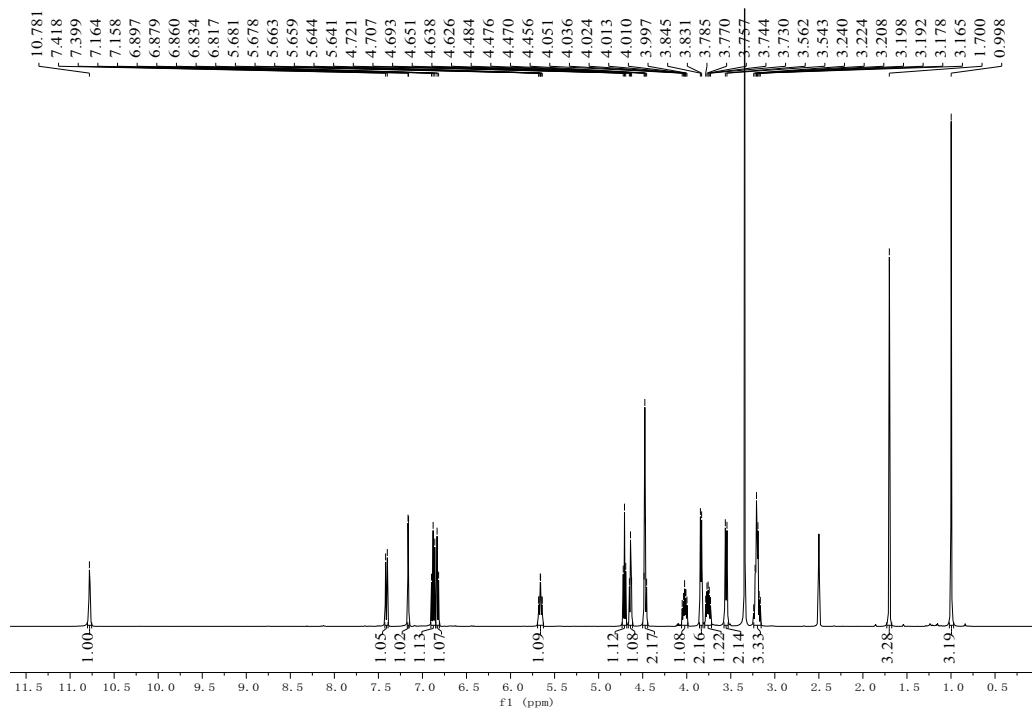

### S2. The $^{13}\text{C NMR}$ Spectrum (100 MHz, $\text{DMSO-}d_6$ ) of Compound 1

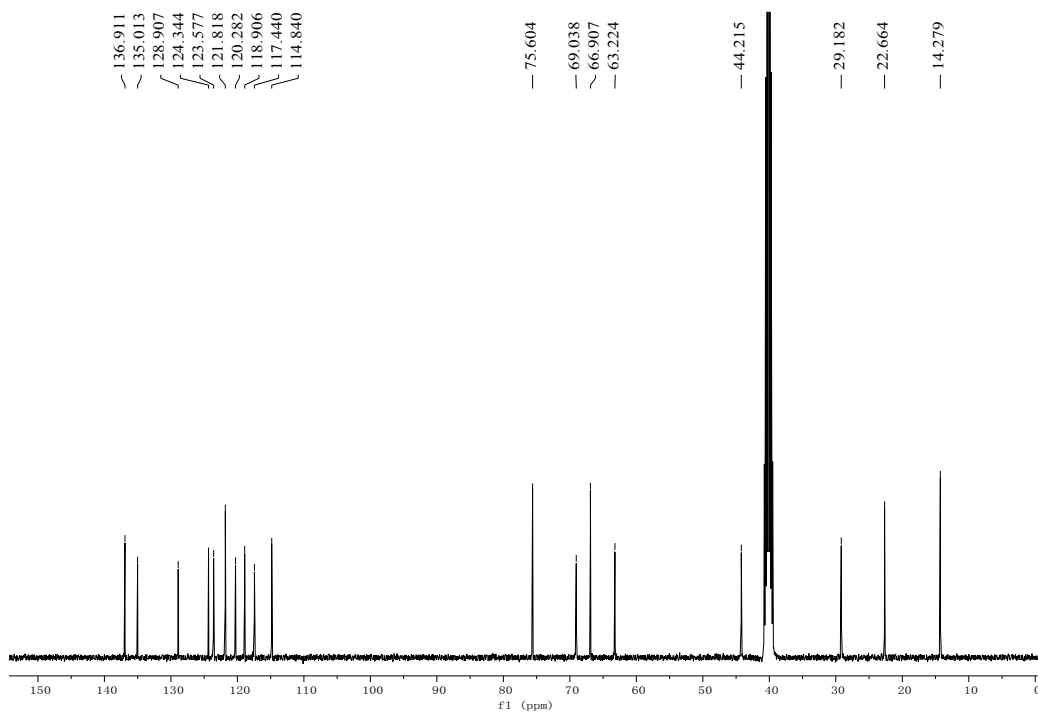

### S3. The DEPT Spectrum of compound 1

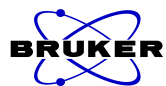

Bruker AVANCEIII 400 20140117  
DEPT DMSO D:\ DATA-2014 4

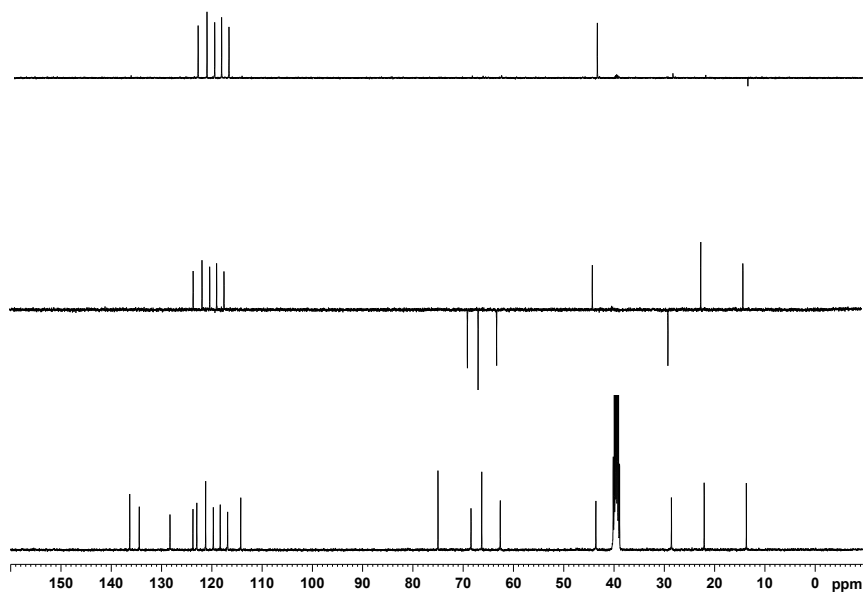

#### S4. The HSQC Spectrum of Compound 1

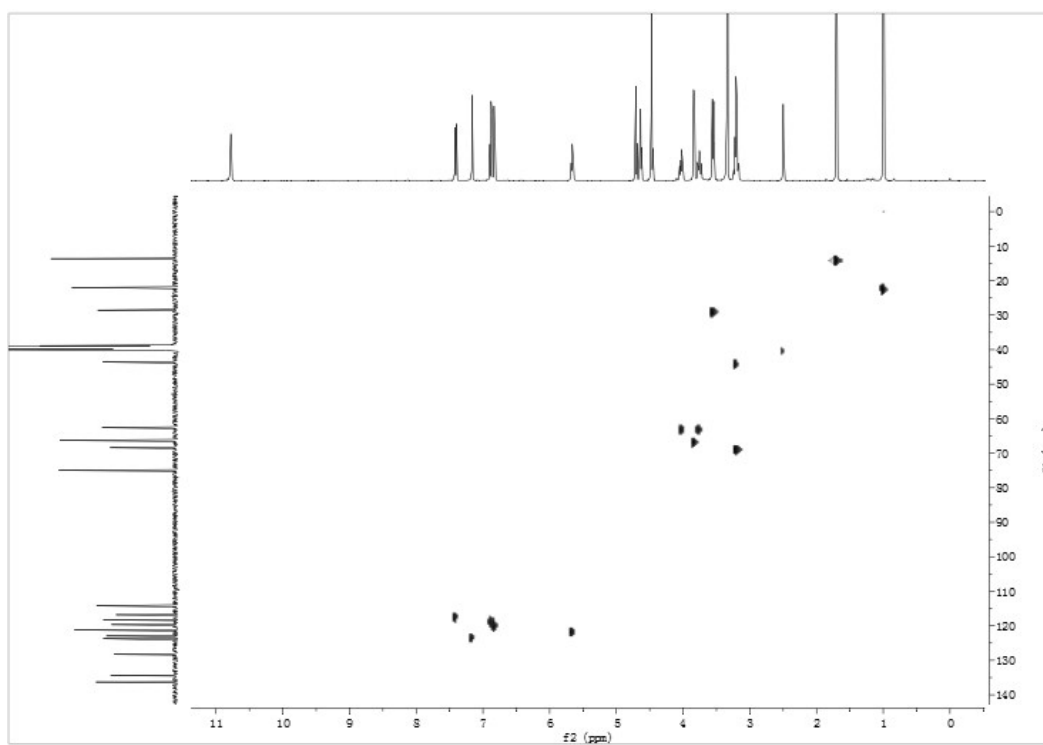

#### S5. The $^1\text{H}$ , $^1\text{H}$ -COSY Spectrum of compound 1

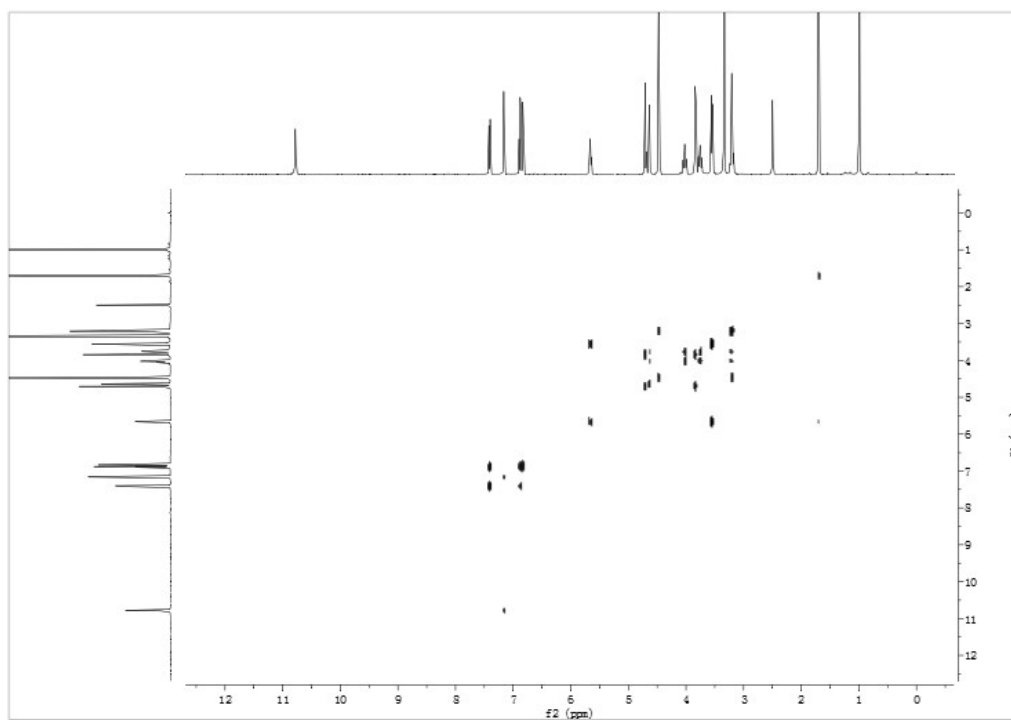

## S6. The HMBC Spectrum of compound 1

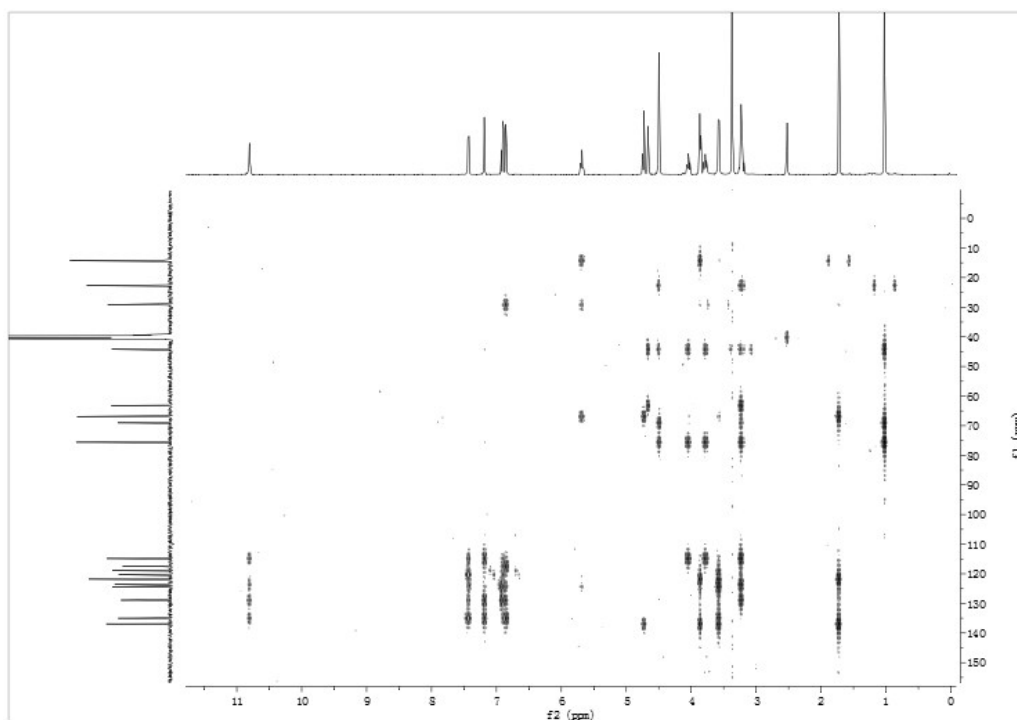

## S7. The NOE difference Spectrum of compound 1

VNS-600 NOESY1D 2hp-20 IN dmsd Dec 4 2014

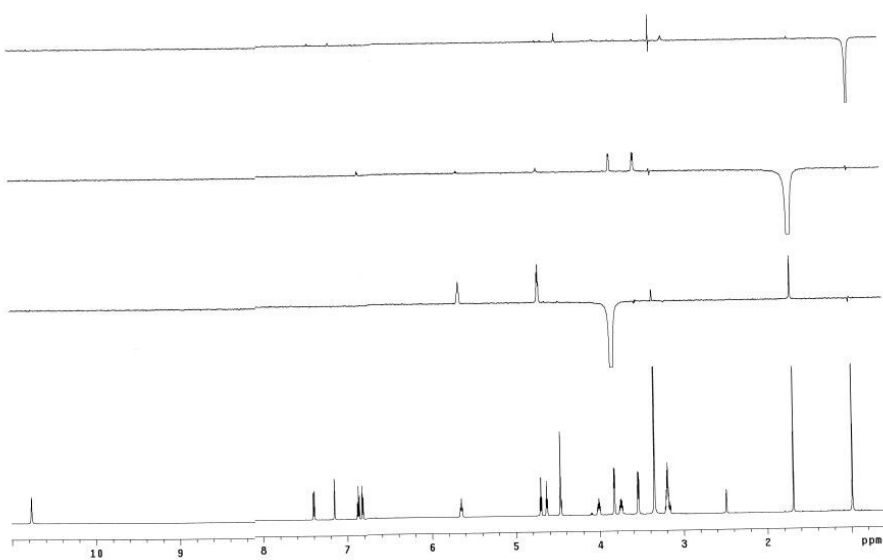

# S8. The HRESIMS Spectrum of Compound 1

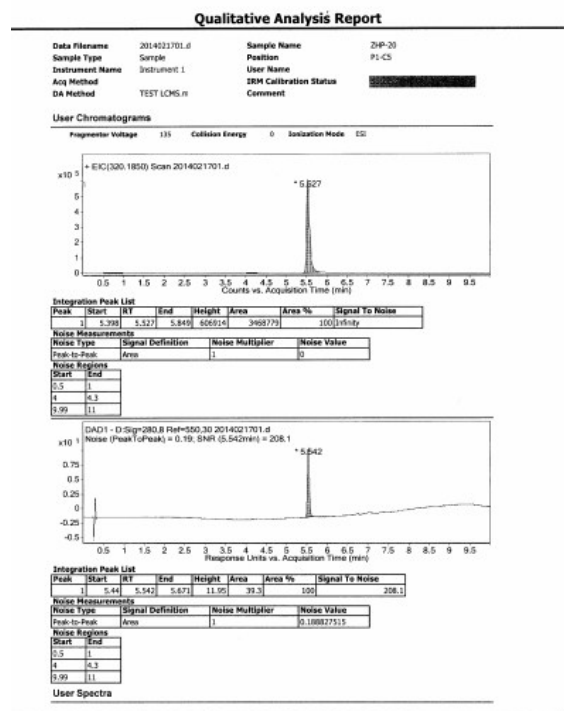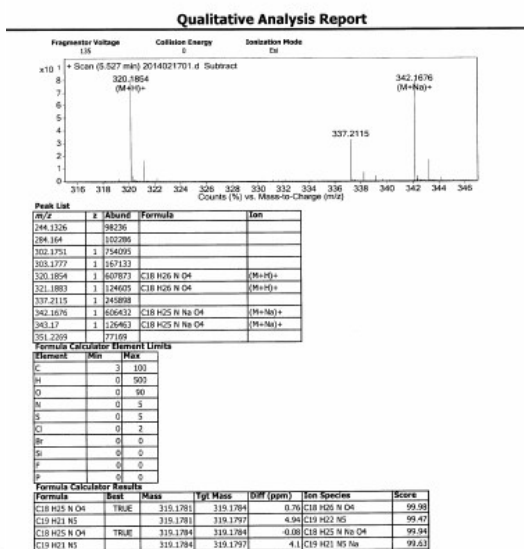

MS Formula Results: + Scan (5.527 min) Sub (2014021701.d)

| m/z      | Ion    | Formula      | Abundance |
|----------|--------|--------------|-----------|
| 320.1804 | (M+H)+ | C18 H26 N O4 | 607873.4  |

| Best | Formula (M)  | Ion Formula  | Calc. m/z | Score | Cross S | Mass     | Calc. Mass | Diff (ppm) | Ab. Diff (ppm) | Abund. Match | Spacing Mat. | Mass Match | m/z      | DBE |
|------|--------------|--------------|-----------|-------|---------|----------|------------|------------|----------------|--------------|--------------|------------|----------|-----|
| 1    | C18 H26 N O4 | C18 H26 N O4 | 320.1804  | 99.98 |         | 319.1781 | 319.1784   | 0.76       | 0.76           | 99.99        | 99.97        | 99.98      | 320.1804 | 7   |
| 2    | C19 H21 N5   | C19 H21 N5   | 320.1817  | 99.47 |         | 319.1781 | 319.1797   | 4.94       | 4.94           | 99.41        | 100          | 99.24      | 320.1804 | 12  |

| m/z      | Ion     | Formula         | Abundance |
|----------|---------|-----------------|-----------|
| 342.1676 | (M+Na)+ | C18 H25 N Na O4 | 606432.1  |

| Best | Formula (M)  | Ion Formula     | Calc. m/z | Score | Cross S | Mass     | Calc. Mass | Diff (ppm) | Ab. Diff (ppm) | Abund. Match | Spacing Mat. | Mass Match | m/z      | DBE |
|------|--------------|-----------------|-----------|-------|---------|----------|------------|------------|----------------|--------------|--------------|------------|----------|-----|
| 1    | C18 H25 N O4 | C18 H25 N Na O4 | 342.1676  | 99.94 |         | 319.1784 | 319.1784   | -0.58      | 0.58           | 99.96        | 99.91        | 99         | 342.1676 | 7   |
| 2    | C19 H21 N5   | C19 H21 N5 Na   | 342.1689  | 99.83 |         | 319.1784 | 319.1797   | 4.1        | 4.1            | 99.54        | 99.93        | 99.53      | 342.1676 | 12  |



### S9. The IR Spectrum of Compound 1a

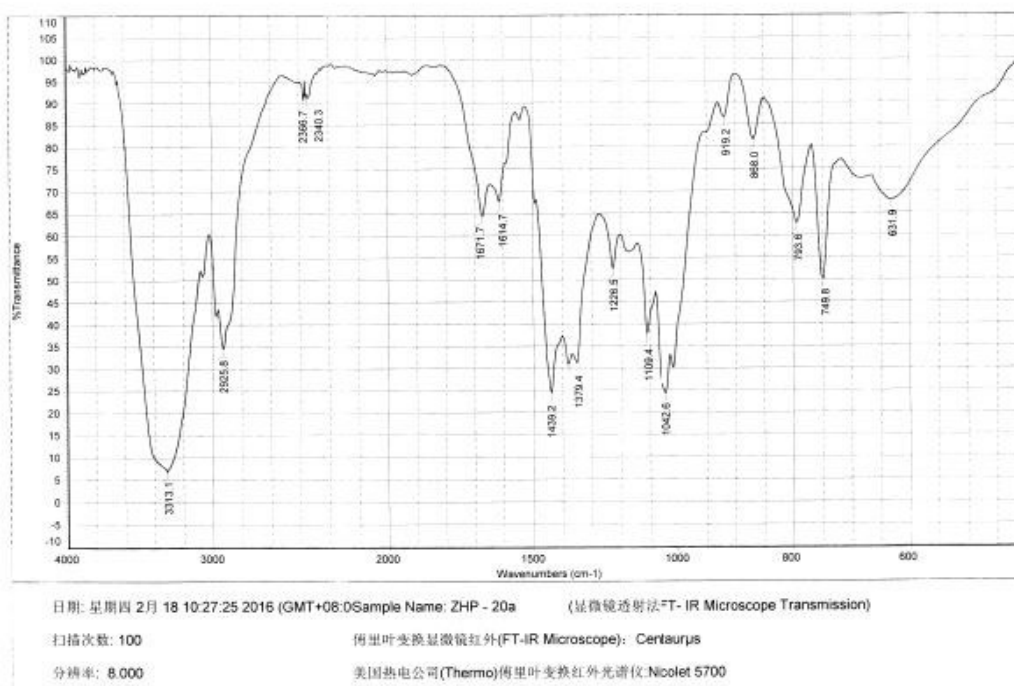

### S10. The IR Spectrum of compound 1b

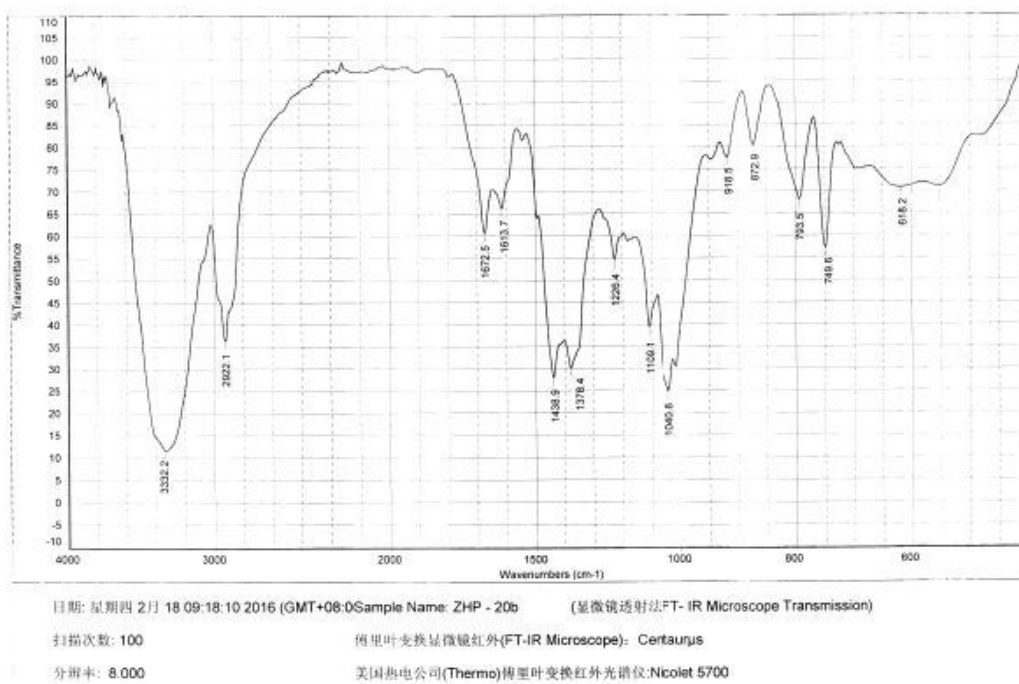

### S11. The CD Spectrum of compound 1a

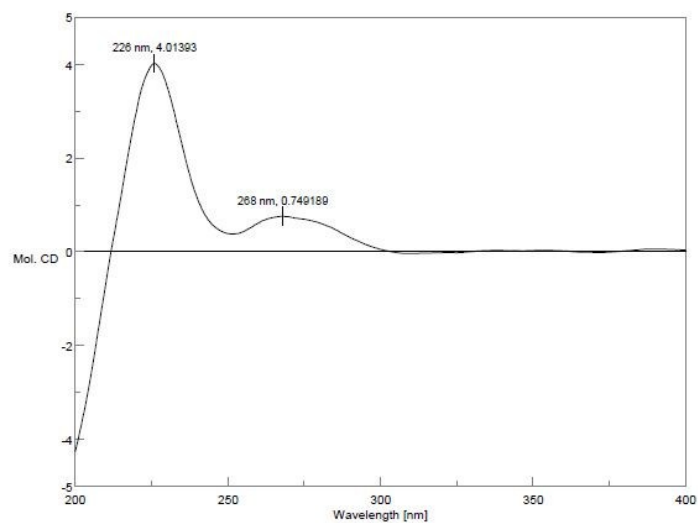

[Comments]  
Sample name ZHP-20a  
Comment  
User  
Date

### S12. The CD Spectrum of compound 1b

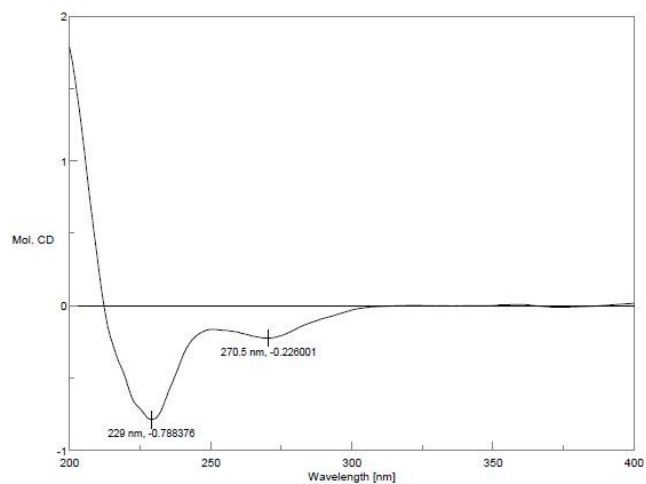

[Comments]  
Sample name ZHP-20b  
Comment  
User  
Date

### S13 The $^1\text{H}$ -NMR (600 MHz, $\text{DMSO}-d_6$ ) Spectrum of compound 1c

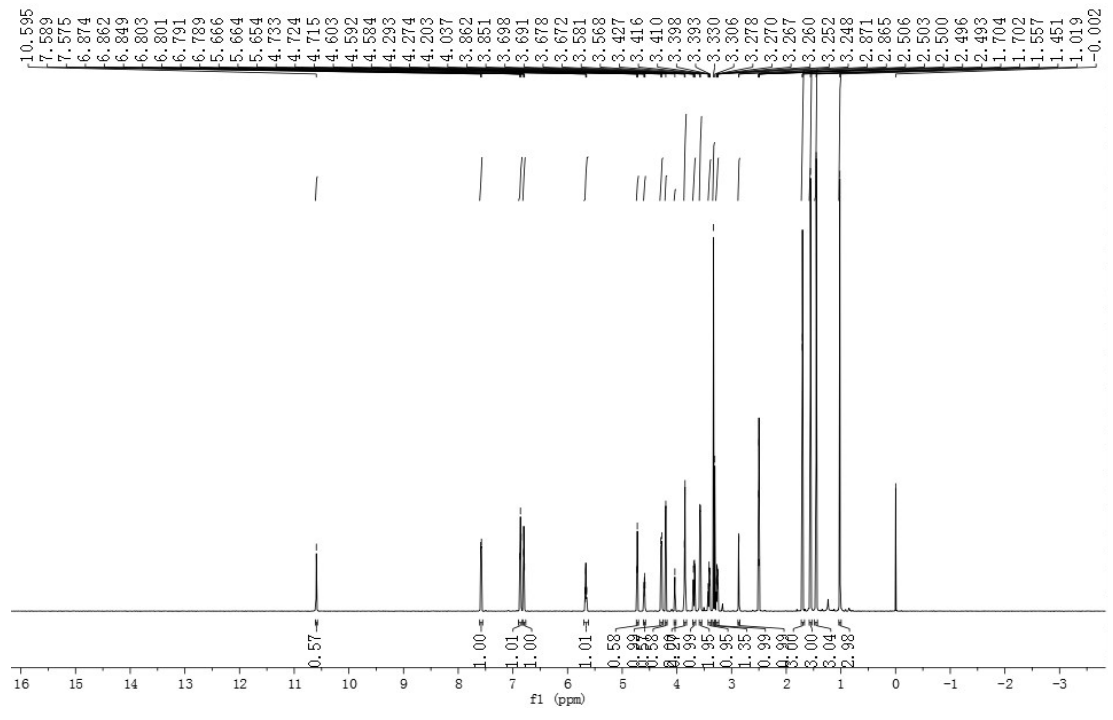

### S14. The $^{13}\text{C}$ NMR Spectrum (150 MHz, $\text{DMSO-}d_6$ ) of Compound 1c

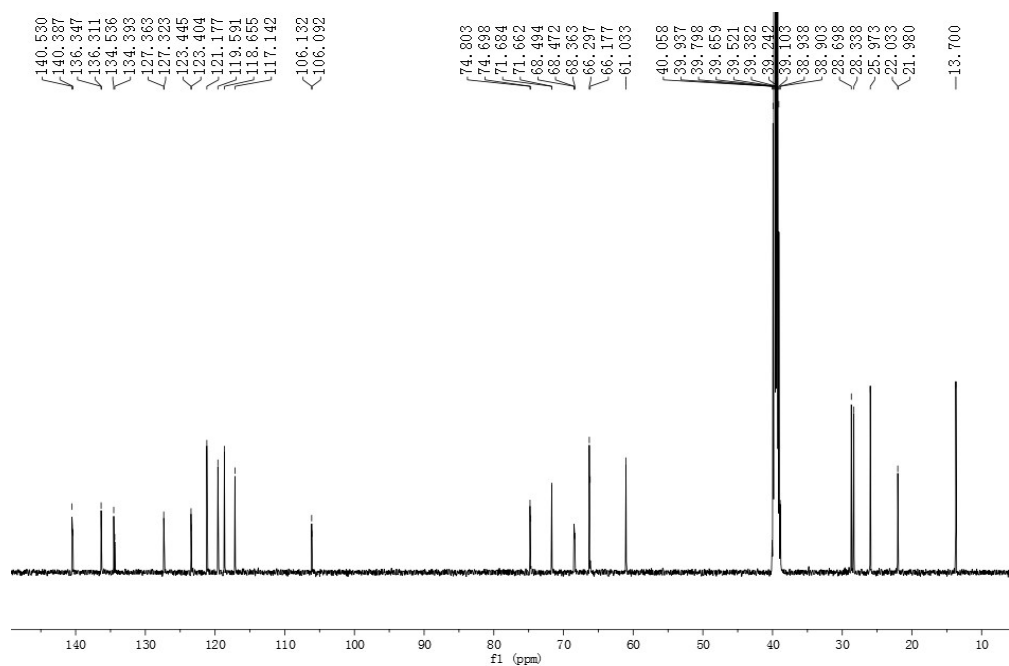

### S15. The HSQC Spectrum of Compound 1c

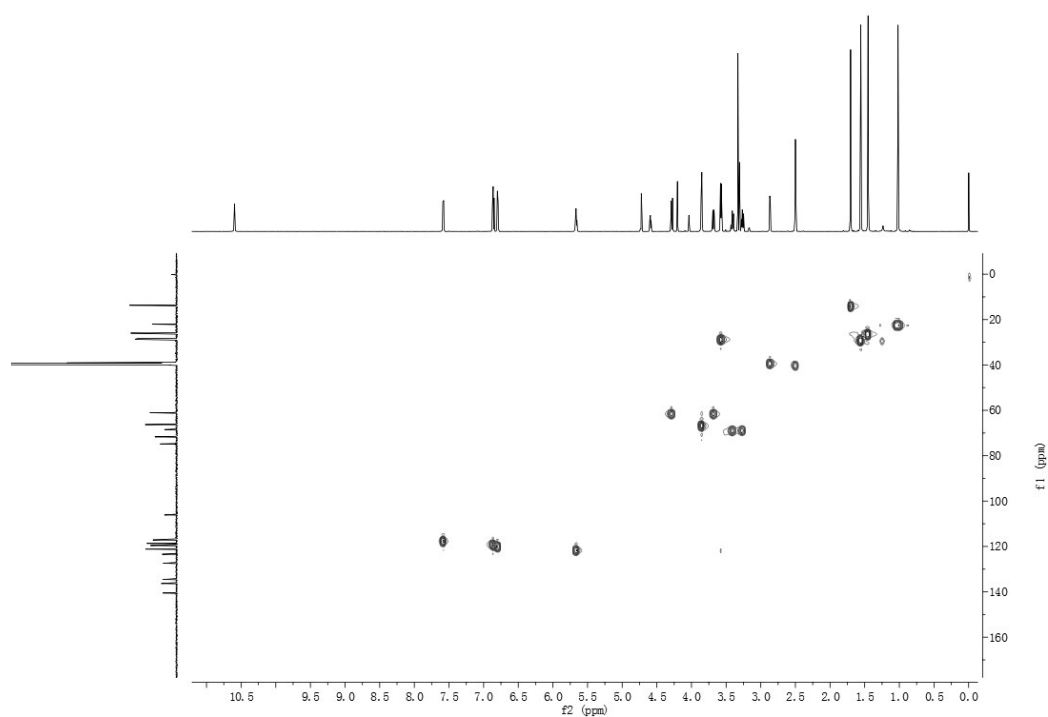

### S16. The $^1\text{H}$ , $^1\text{H}$ -COSY Spectrum of compound 1c

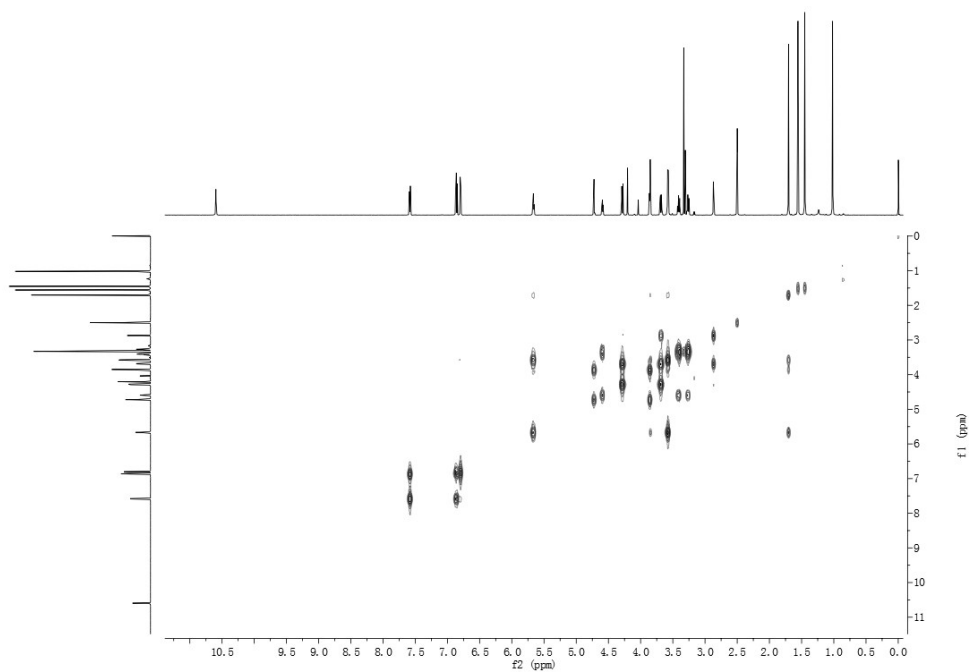

### S17. The HMBC Spectrum of Compound 1c

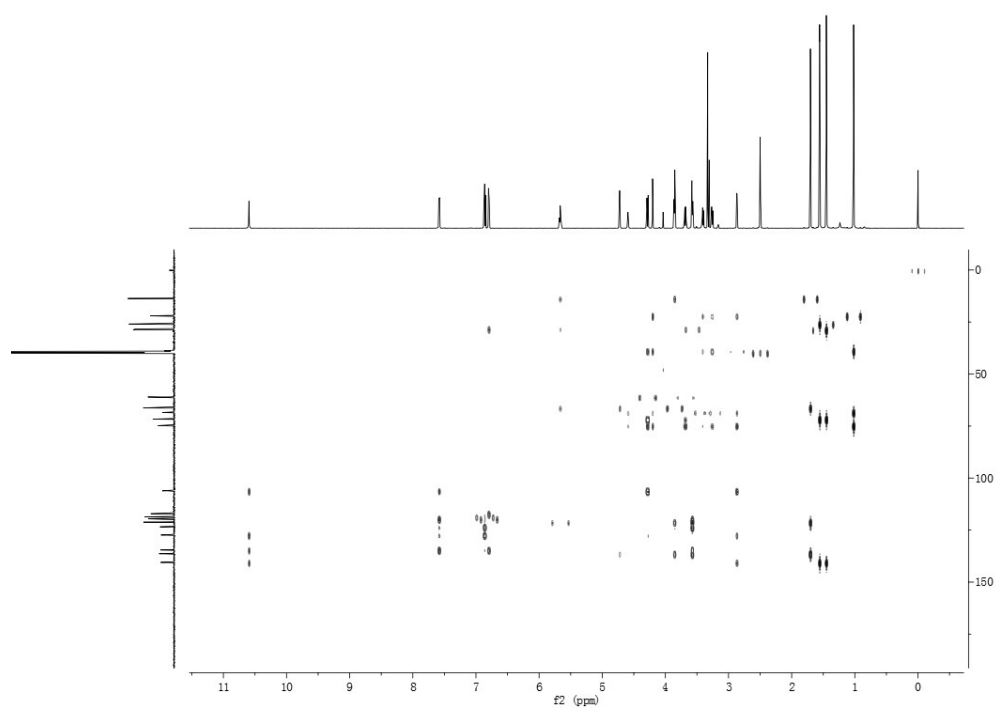

### S18. The NOE difference Spectrum of compound 1c

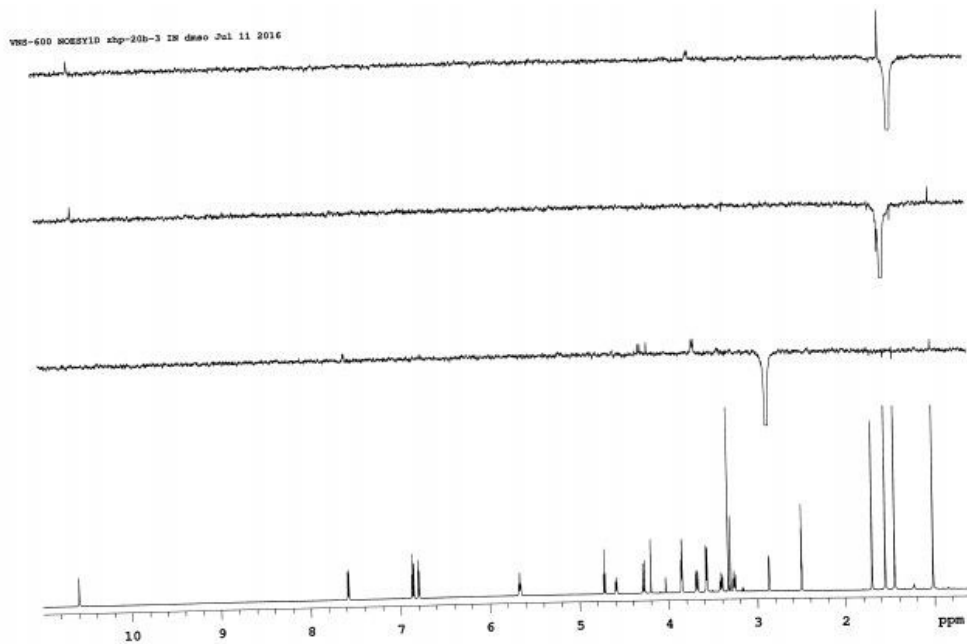

# S19. The HREIMS Spectrum of compound 1c

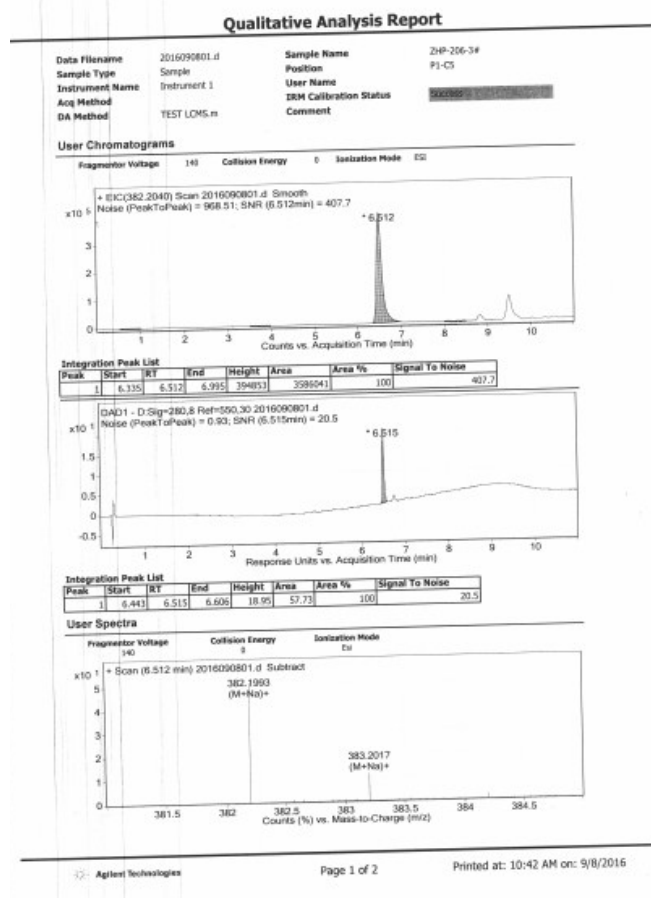

## MS Formula Results: + Scan (6.512 min) Sub (2016090801.d)

| m/z      | Ion                 | Formula         | Abundance |
|----------|---------------------|-----------------|-----------|
| 382.1993 | (M+Na) <sup>+</sup> | C21 H29 N Na O4 | 497954.7  |

  

| Best | Formula (M)  | Ion Formula     | Score | Cross Sco | Mass   | Calc Mass | Calc m/z | Diff (ppm) | Abs Diff (ppm) | Mass Match | Abund Match | Spacing Match | DBE |
|------|--------------|-----------------|-------|-----------|--------|-----------|----------|------------|----------------|------------|-------------|---------------|-----|
| ✓    | C21 H29 N O4 | C21 H29 N Na O4 | 99.93 |           | 359.21 | 359.2097  | 382.1989 | -1.05      | 1.05           | 99.97      | 99.94       | 99.84         | 8   |

## S20. The IR Spectrum of Compound 1c

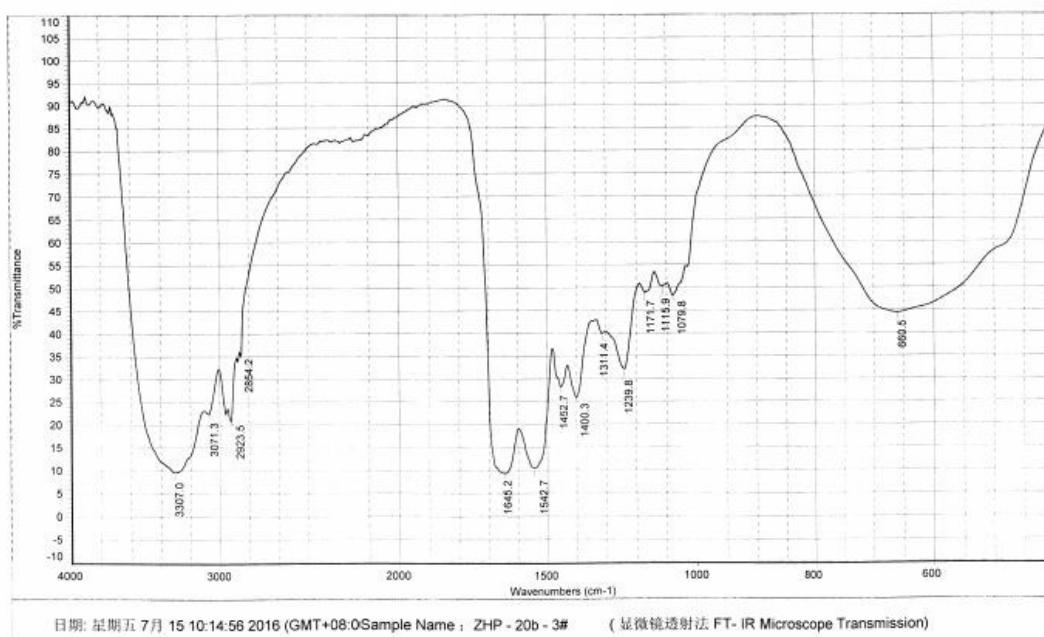

## S21. The CD Spectrum of compound 1c

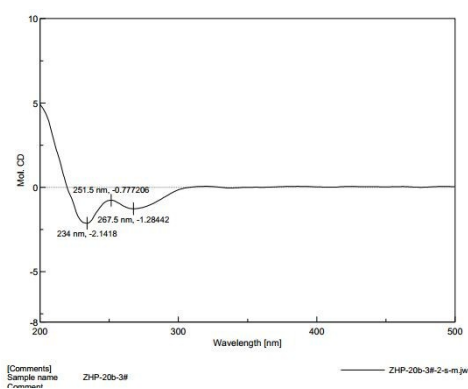



**S22. The CD spectrum of compound 1c in a DMSO of dimolybdenum tetraacetate (the inherent CD of the diol was subtracted)**

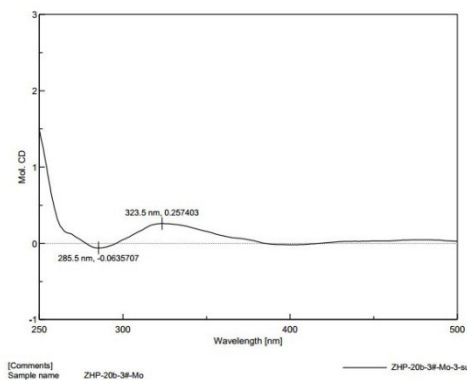

**S23. The Calculated ECD spectra of (2'R, 3'R), (2'R, 3'S), (2'S, 3'R), (2'S, 3'S)-1c and the experimental ECD spectrum of 1c**

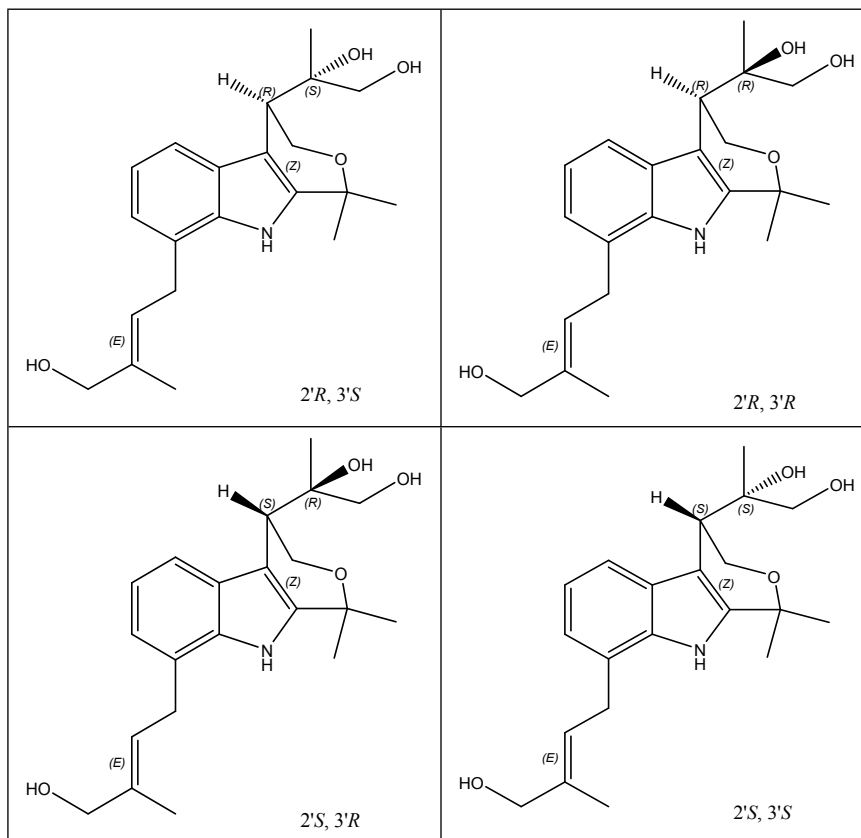

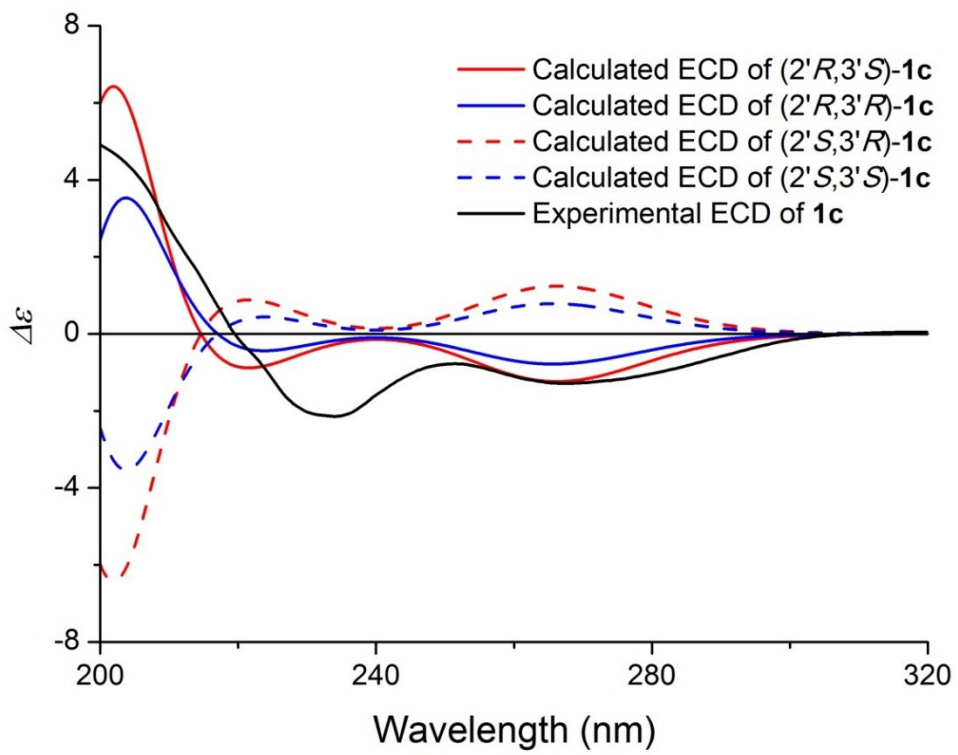

# S24. The $^1\text{H}$ NMR Spectrum (600 MHz, $\text{DMSO-}d_6$ ) of compound 2

Bruker AVIIIHD 600 20141120  
PROTON DMSO D:\ DATA2014 60

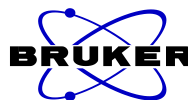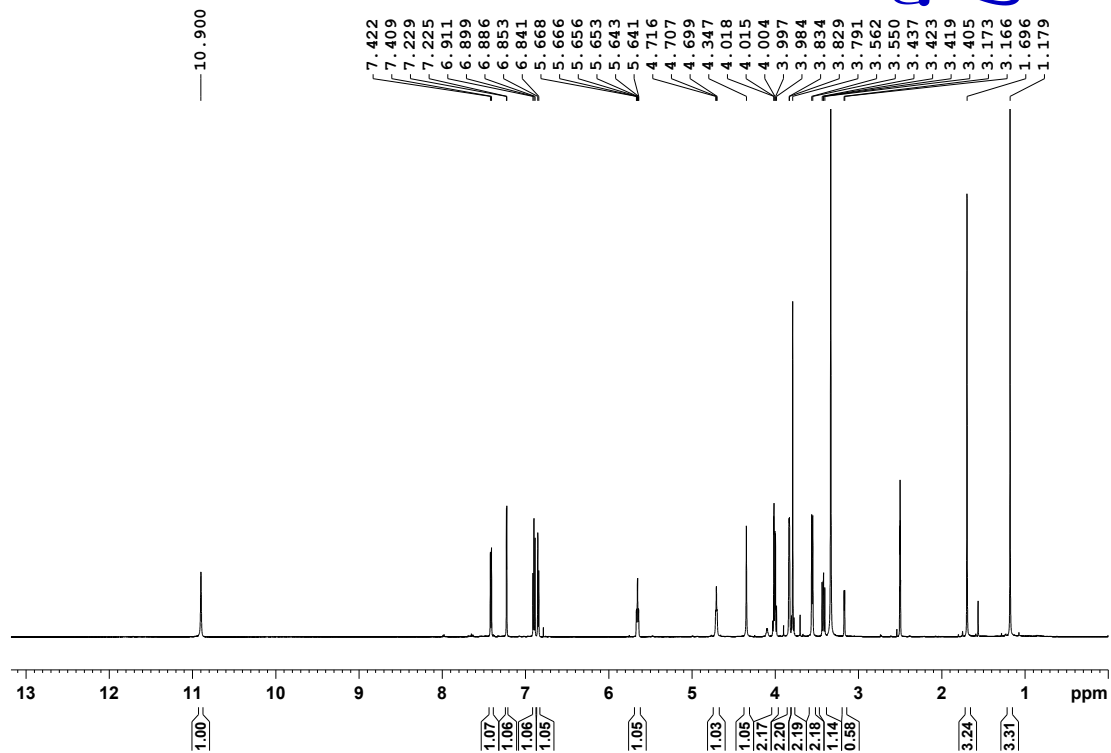

## S25. The $^{13}\text{C}$ NMR Spectrum (150 MHz, $\text{DMSO-}d_6$ ) of compound 2

Bruker AVIIIHD 600 20140928  
C13 DMSO D:\ DATA2014 16

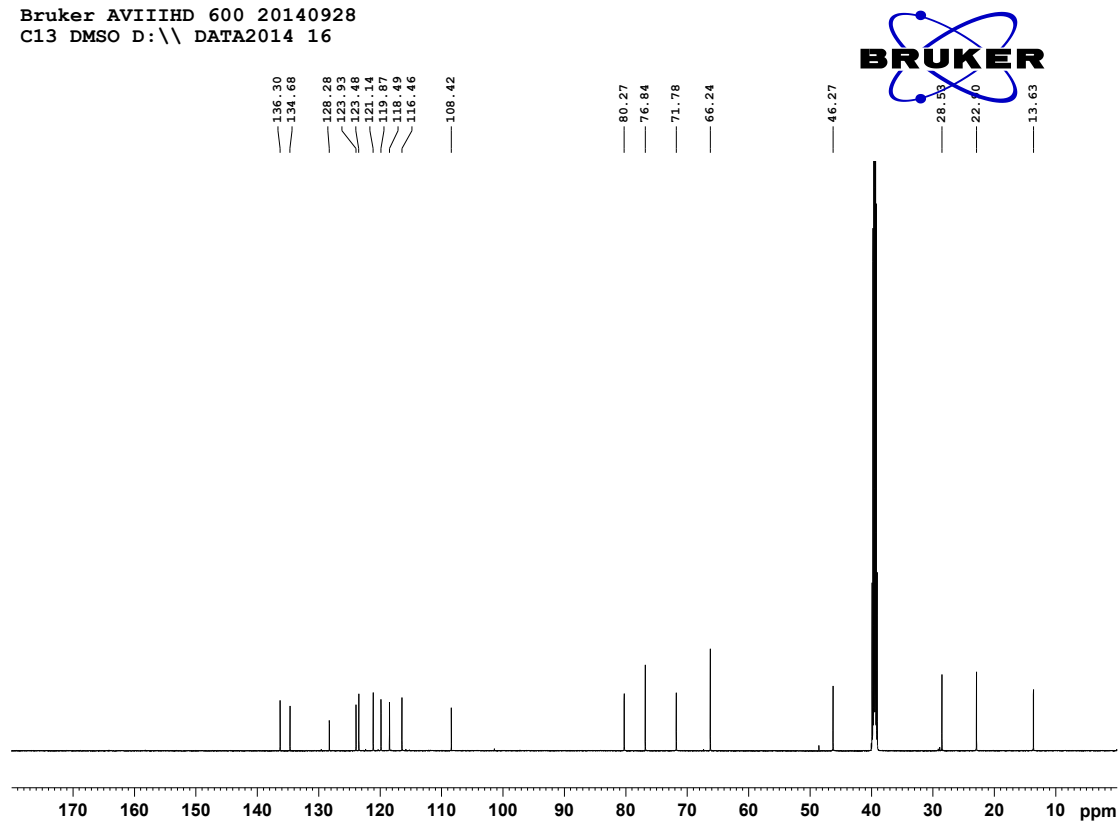

## S26. The DEPT Spectrum of compound 2

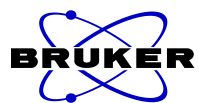

Bruker AVIIIHD 600 20140928  
DEPT DMSO D:\ DATA2014 16

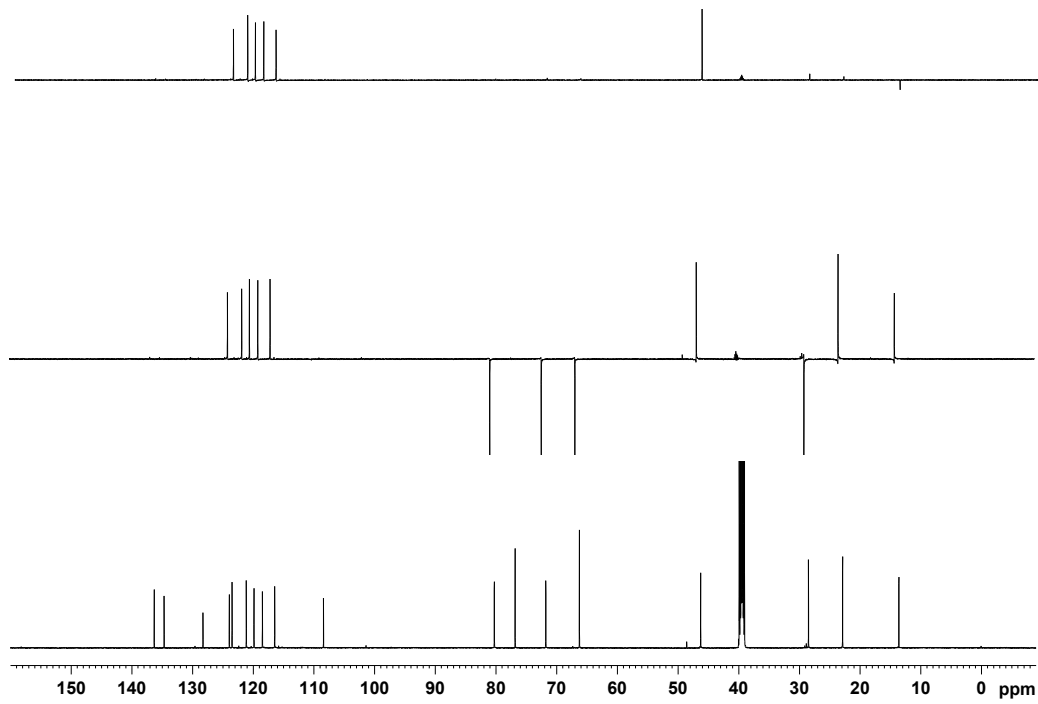

## S27. The $^1\text{H}$ , $^1\text{H}$ -COSY Spectrum of compound 2

Bruker AVIIIHD 600 20141208  
1H,1H-COSY DMSO D:\DATA2014 29

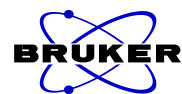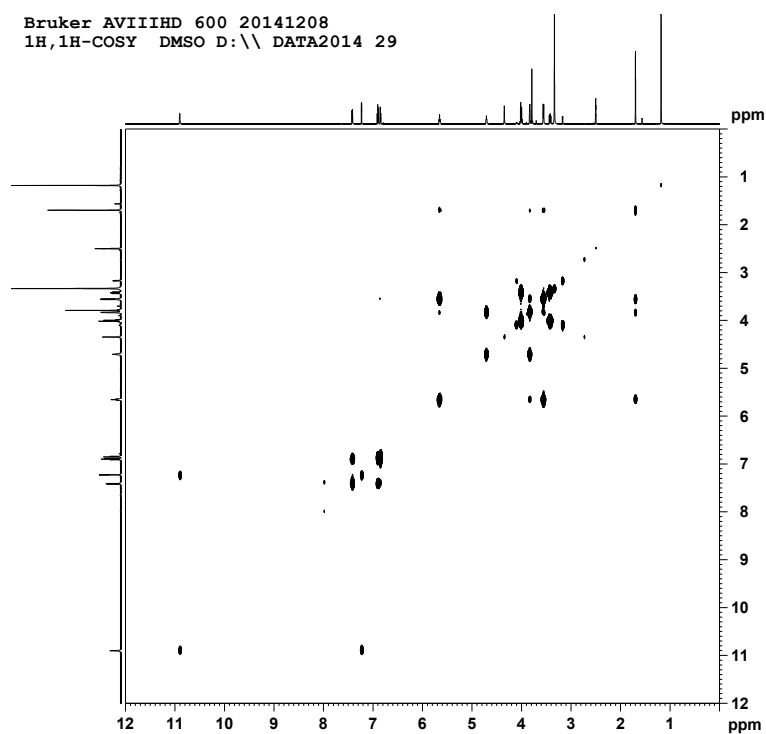

```
NAME      20141208  zhp-c22
EXPNO     2
PROCNO    1
Date_     20141222
Time      11.58
INSTRUM   spect
PROBHD    5 mm CPDCH 13C
PULPROG   cosygmfgf
TD         2048
SOLVENT   DMSO
NS         4
DS         16
SWH        8417.509 Hz
FIDRES     4.110112 Hz
AQ         0.1217012 sec
RG         2050
DW         59.400 usec
DE         20.00 usec
TE         298.2 K
DO         0.0000300 sec
D1         2.00000000 sec
D13        0.00000400 sec
D16        0.00020000 sec
IN0        0.00011900 sec

===== CHANNEL f1 =====
SF01      600.2540217 MHz
NUC1       1H
F1         11.50 usec
ND0        1
TD         128
SF01      600.254 MHz
FIDRES     68.651260 Hz
SW         14.000 ppm
F1MODE     QF
SI         1024
SF         600.2500000 MHz
WDW        SINE
SSB        0
LB         0.00 Hz
GB         0
PC         1.40
SI         1024
MC2        QF
SF         600.2500000 MHz
WDW        SINE
SSB        0
LB         0.00 Hz
GB         0
```

## S28. The HSQC Spectrum of compound 2

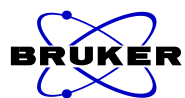

Bruker AVIIIHD 600 20141208  
HSQC DMSO D:\ \ DATA2014 29

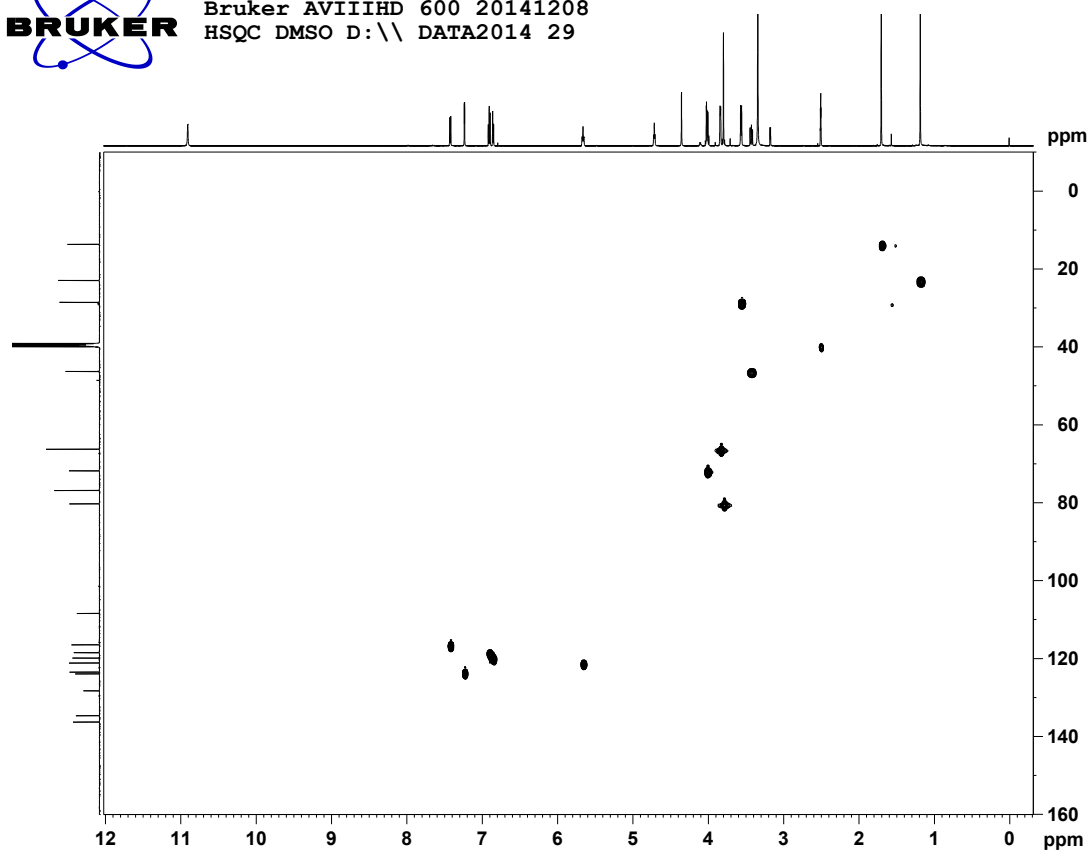

### S29. The HMBC Spectrum of compound 2

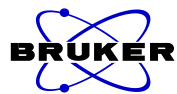

Bruker AVIIIHD 600 20141120  
HMBC DMSO D:\ DATA2014 60

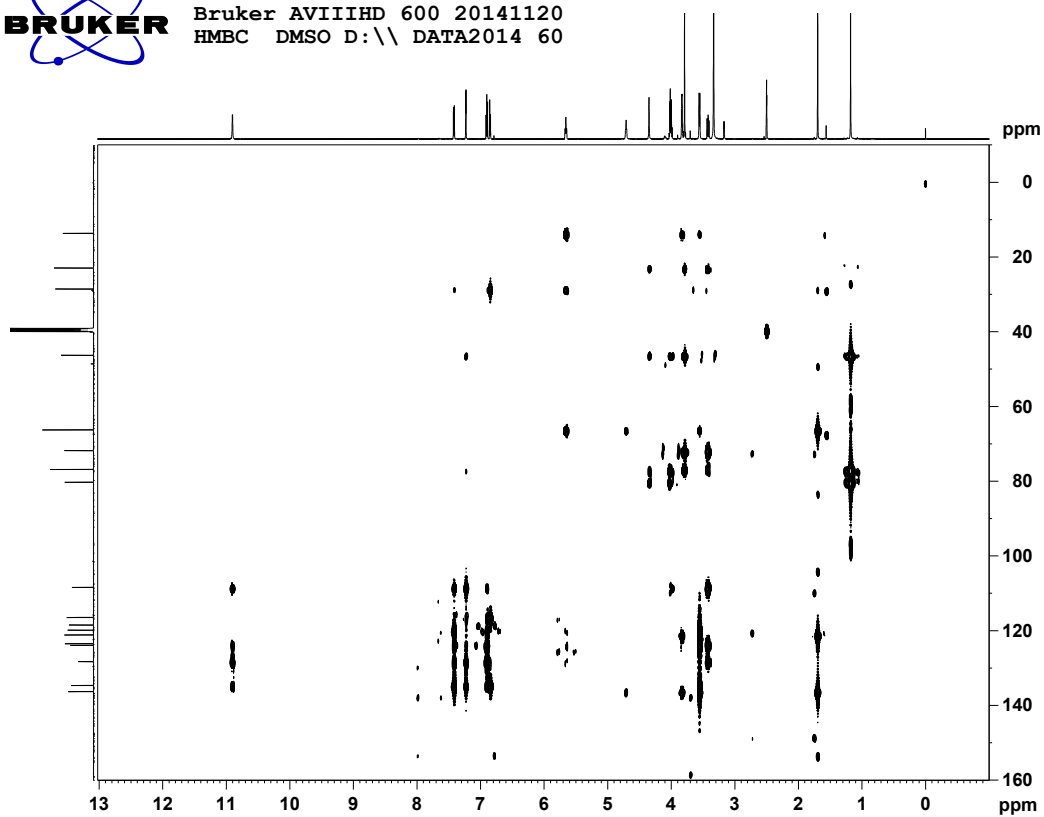

### S30. The NOE Spectrum of compound 2

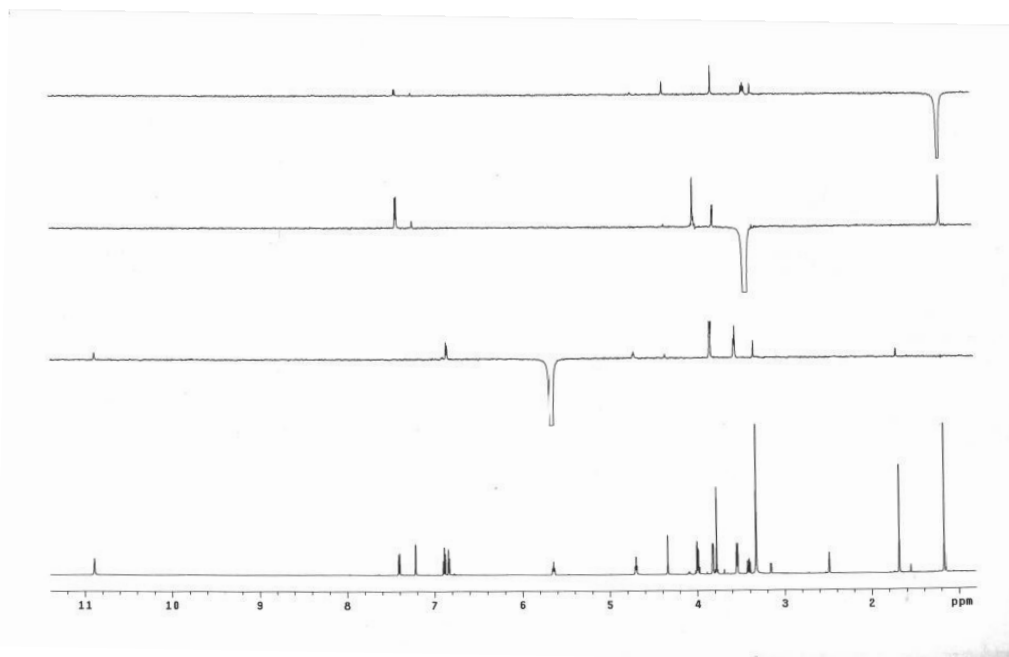



## S31. The HRESIMS Spectrum of compound 2

### Qualitative Analysis Report

Data Filename: 2014110202.d      Sample Name: ZHP-C22  
 Sample Type: Sample                      Position: F1-C3  
 Instrument Name: Instrument 1            User Name:  
 Acq Method:                                  IRM Calibration Status: XXXXXXXXXX  
 DA Method: TEST.LOYS.m                  Comment:

#### User Chromatograms

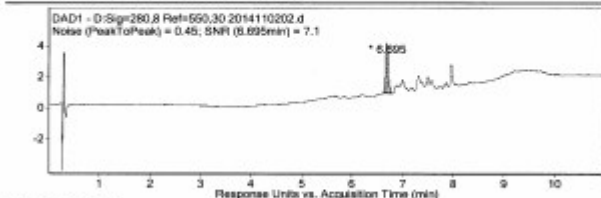

#### Integration Peak List

| Peak | Start | RT    | End   | Height | Area  | Area % | Signal To Noise |
|------|-------|-------|-------|--------|-------|--------|-----------------|
| 1    | 6.626 | 6.695 | 6.806 | 3.2    | 12.33 | 100    | 7.1             |

Fragmentor Voltage: 135      Collision Energy: 0      Ionization Mode: ESI

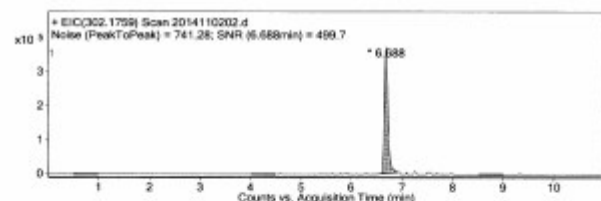

#### Integration Peak List

| Peak | Start | RT    | End   | Height | Area    | Area % | Signal To Noise |
|------|-------|-------|-------|--------|---------|--------|-----------------|
| 1    | 6.575 | 6.688 | 6.945 | 370438 | 3824154 | 100    | 499.7           |

#### User Spectra

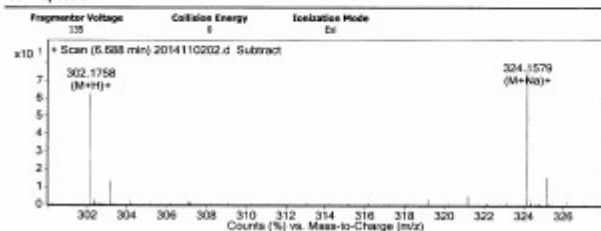

#### MS Formula Results: + Scan (6.688 min) Sub (2014110202.d)

| m/z      | Ion                 | Formula       | Abundance |           |          |           |          |            |                |            |             |               |     |
|----------|---------------------|---------------|-----------|-----------|----------|-----------|----------|------------|----------------|------------|-------------|---------------|-----|
| 302.1758 | (M+H) <sup>+</sup>  | C18H24N O3    | 373612    |           |          |           |          |            |                |            |             |               |     |
| Best     | Formula (M)         | Ion Formula   | Score     | Cross Sco | Mass     | Calc Mass | Calc m/z | Diff (ppm) | Abs Diff (ppm) | Mass Match | Abund Match | Spacing Match | DBE |
| ✓        | C18H23N O3          | C18H24N O3    | 99.81     |           | 301.1686 | 301.1678  | 302.1751 | -2.57      | 2.57           | 99.8       | 99.77       | 99.87         | 8   |
| m/z      | Ion                 | Formula       | Abundance |           |          |           |          |            |                |            |             |               |     |
| 324.1579 | (M+Na) <sup>+</sup> | C18H23N Na O3 | 458262.4  |           |          |           |          |            |                |            |             |               |     |
| Best     | Formula (M)         | Ion Formula   | Score     | Cross Sco | Mass     | Calc Mass | Calc m/z | Diff (ppm) | Abs Diff (ppm) | Mass Match | Abund Match | Spacing Match | DBE |
| ✓        | C18H23N O3          | C18H23N Na O3 | 99.89     |           | 301.1687 | 301.1678  | 324.157  | -2.86      | 2.86           | 99.78      | 99.88       | 100           | 8   |

### S32. The IR Spectrum of compound 2a

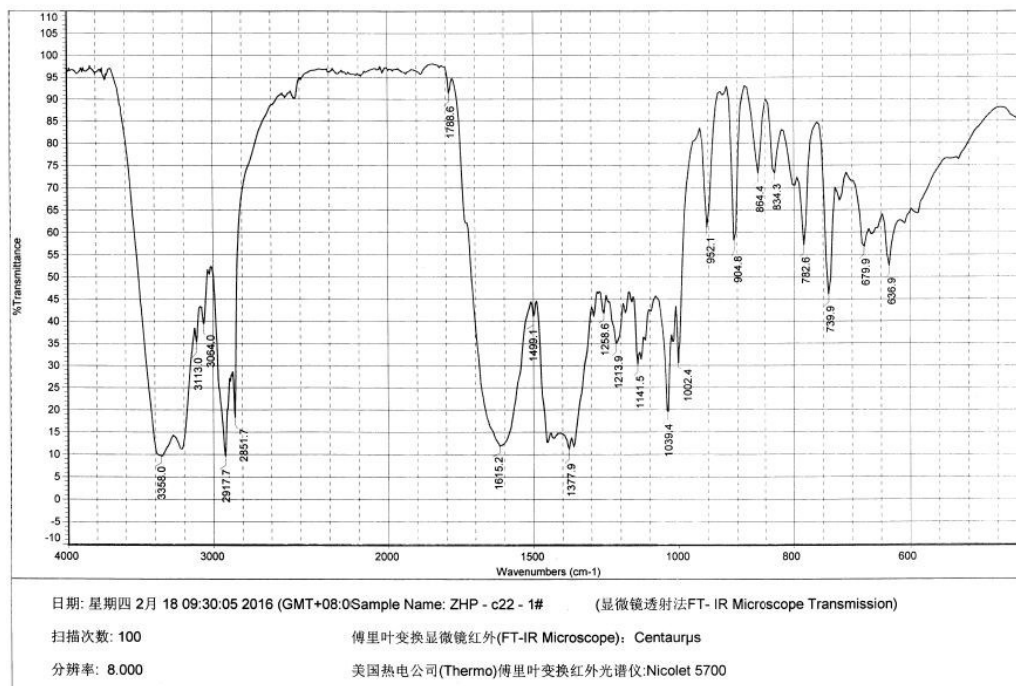

### S33. The IR Spectrum of compound 2b

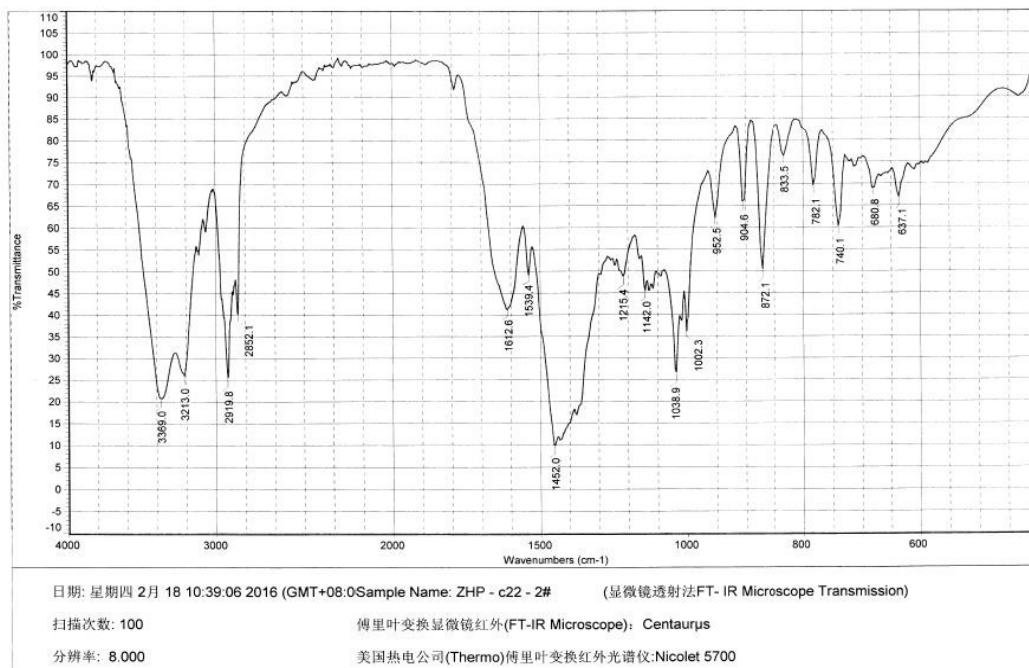

### S34. The CD Spectrum of compound 2a

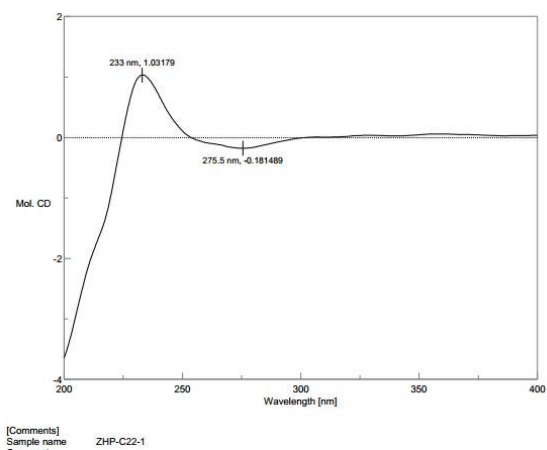

### S35. The CD Spectrum of compound 2b

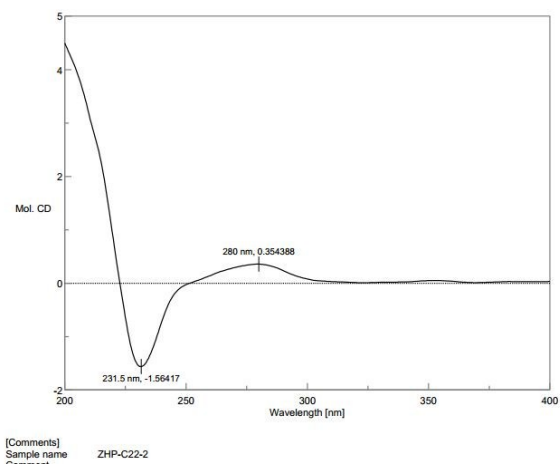

### S36. Calculated ECD spectra of (2'R, 3'S), (2'S, 3'R), (2'R, 3'R), (2'S, 3'S)-2 and the experimental ECD spectrum of 2a and 2b

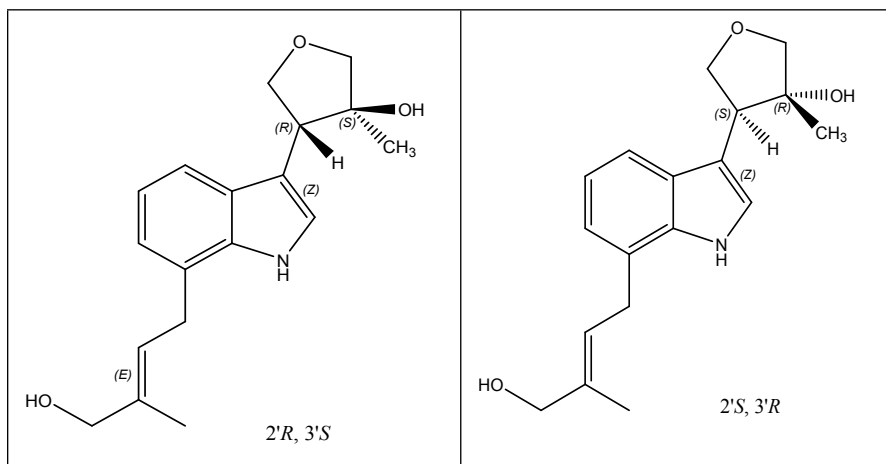

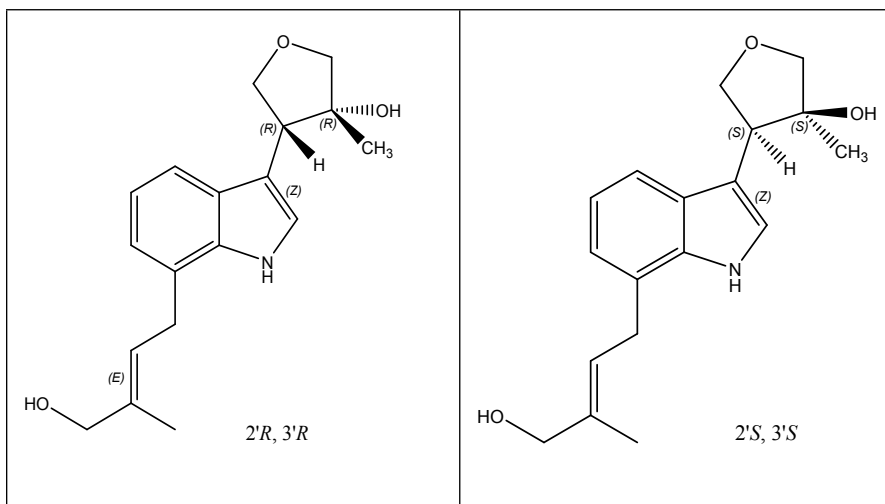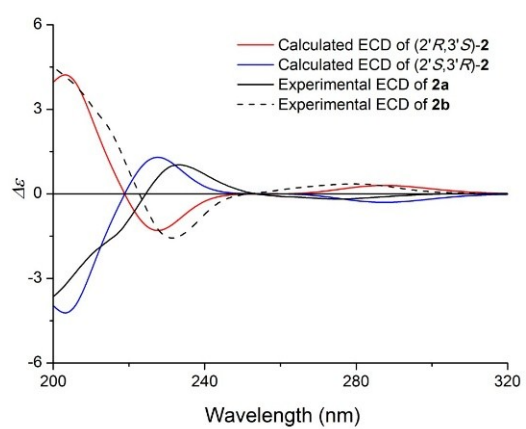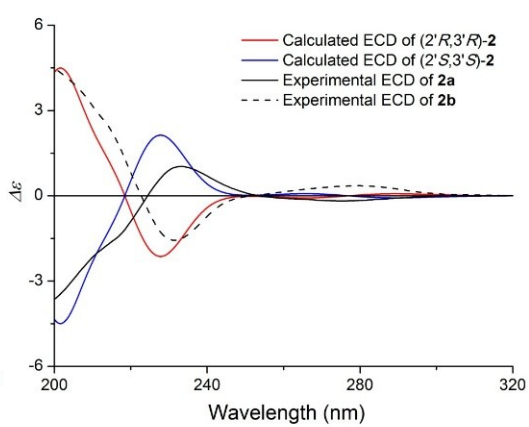

S37. The  $^1\text{H}$  NMR Spectrum (400 MHz,  $\text{DMSO-}d_6$ ) of compound 3

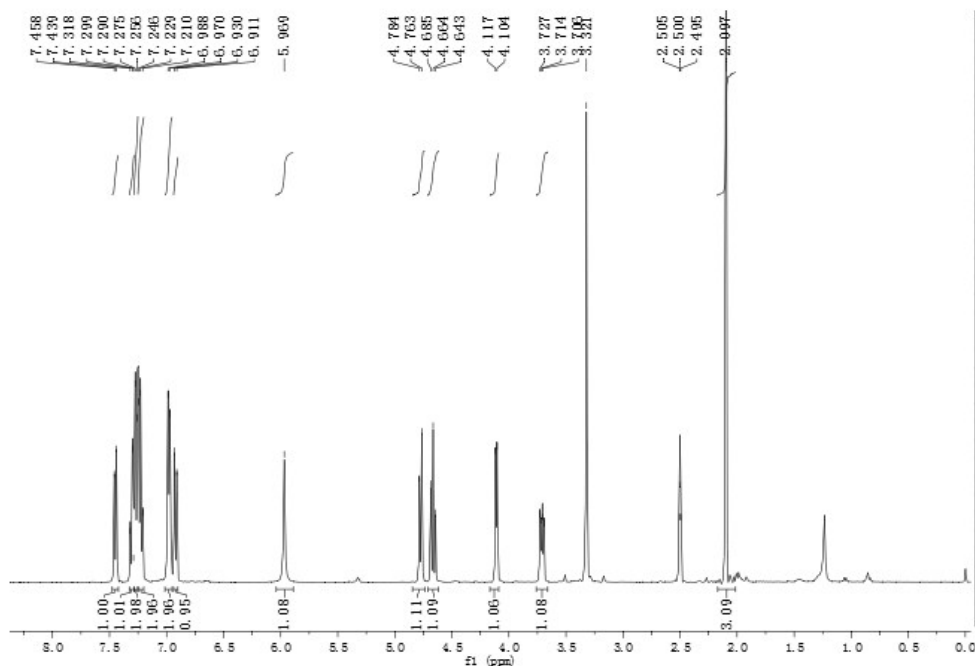

S38. The  $^{13}\text{C}$  NMR Spectrum (100 MHz,  $\text{DMSO-}d_6$ ) of compound 3

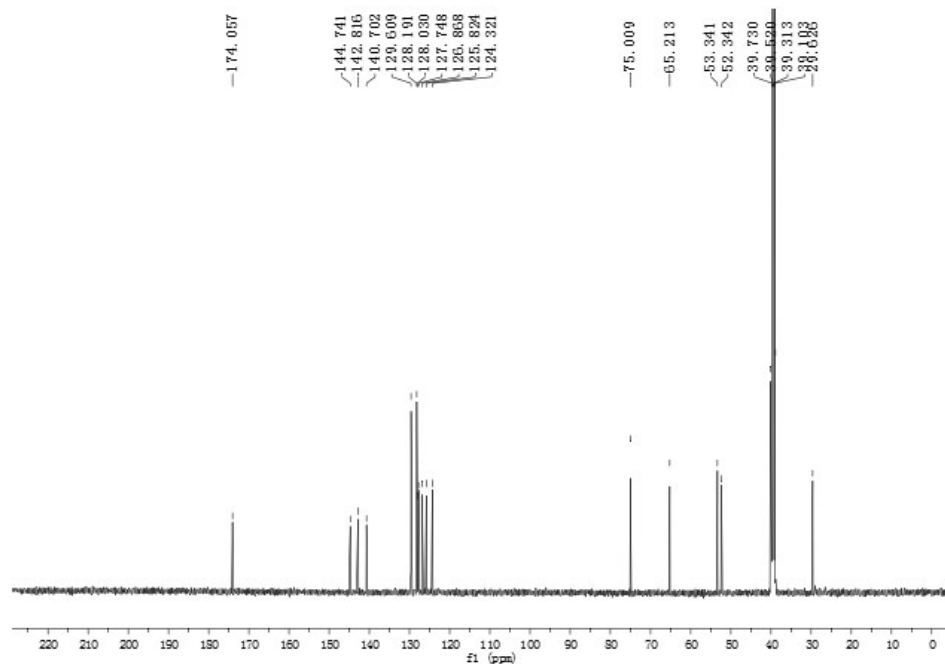

### S39. The DEPT Spectrum of compound 3

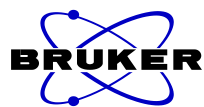

Bruker AVANCEIII 400 20150302  
DEPT DMSO D:\ \ DATA-2015 23

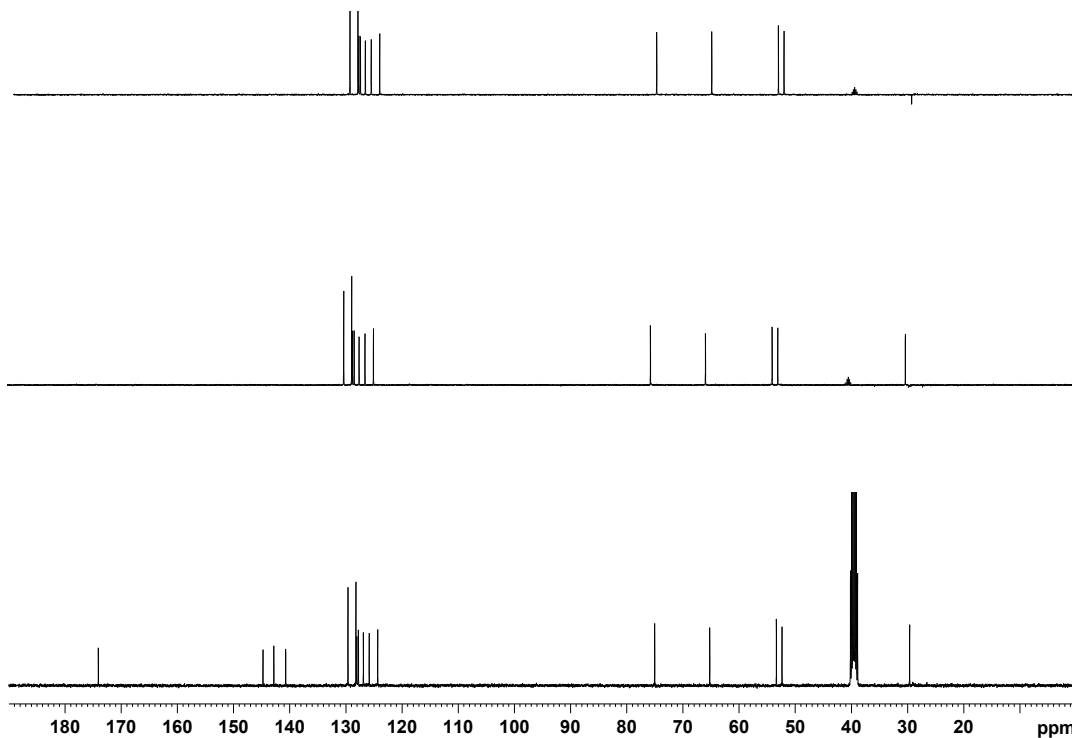

### S40. The HSQC Spectrum of compound 3

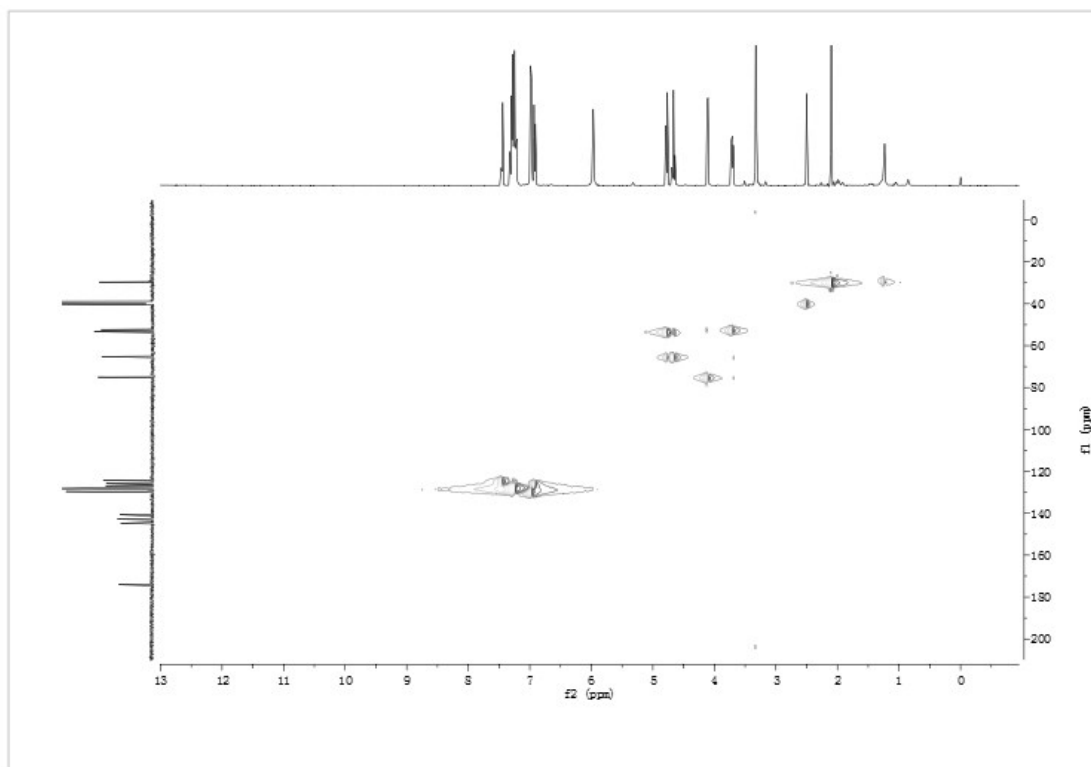



S41. The  $^1\text{H}$ ,  $^1\text{H}$ -COSY Spectrum of compound 3

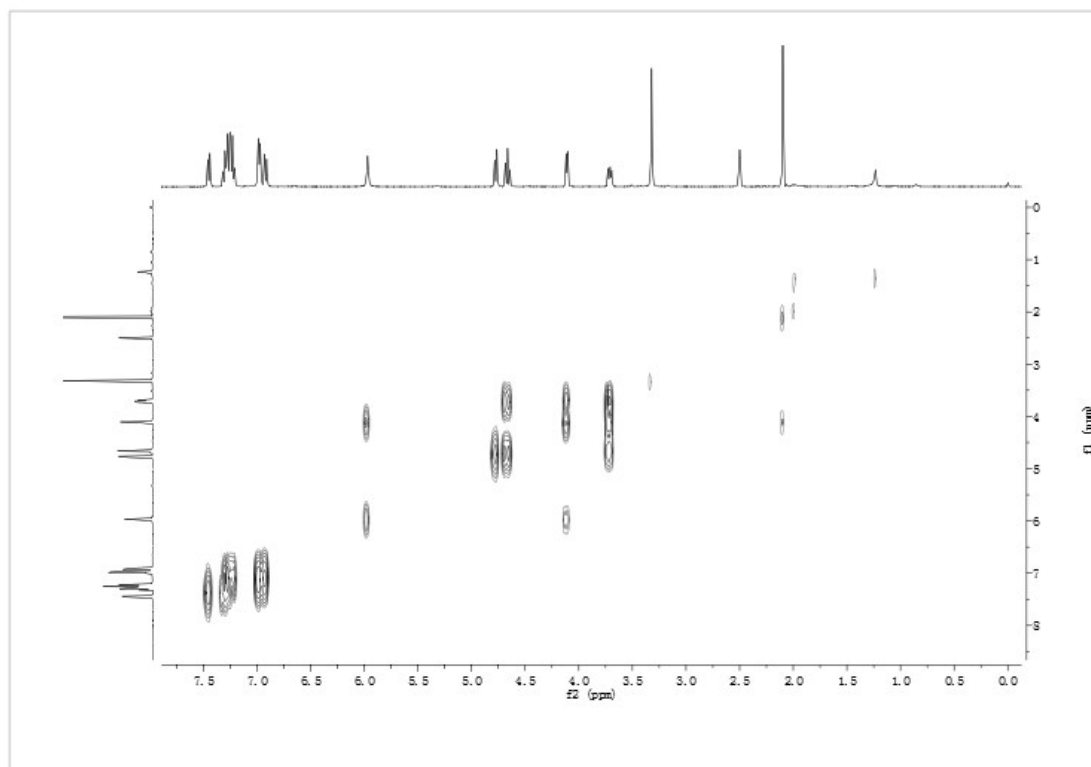

S42. The HMBC Spectrum of compound 3

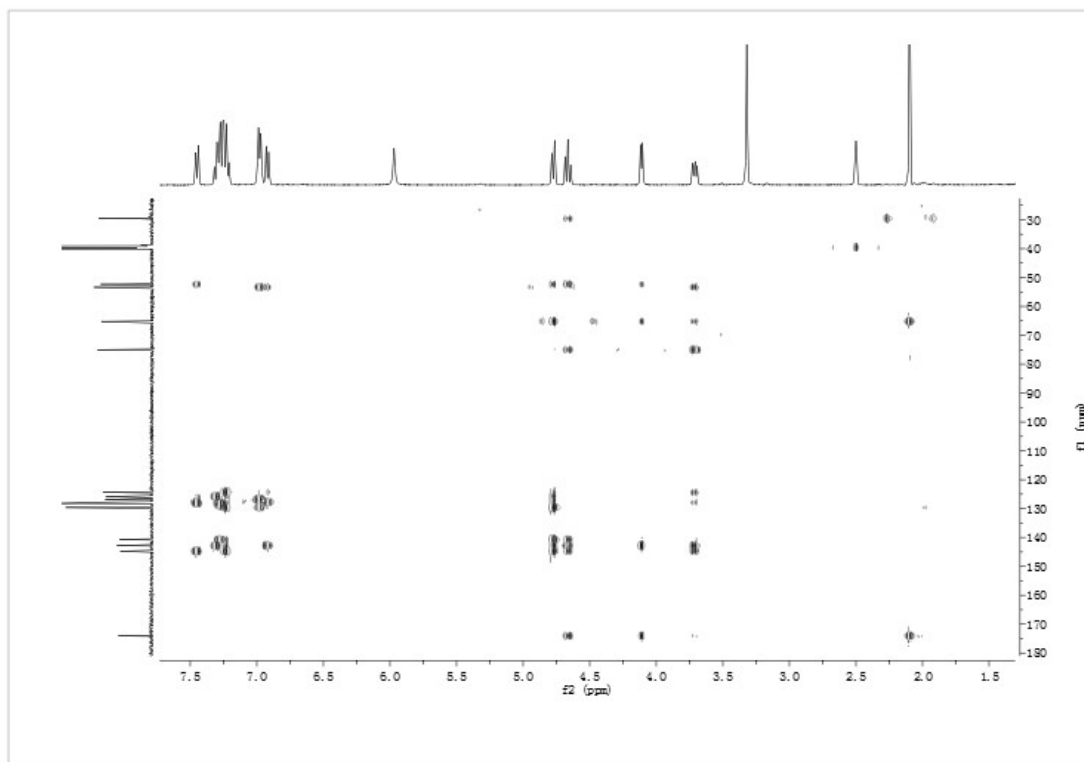

### S43. The NOESY Spectrum of compound 3

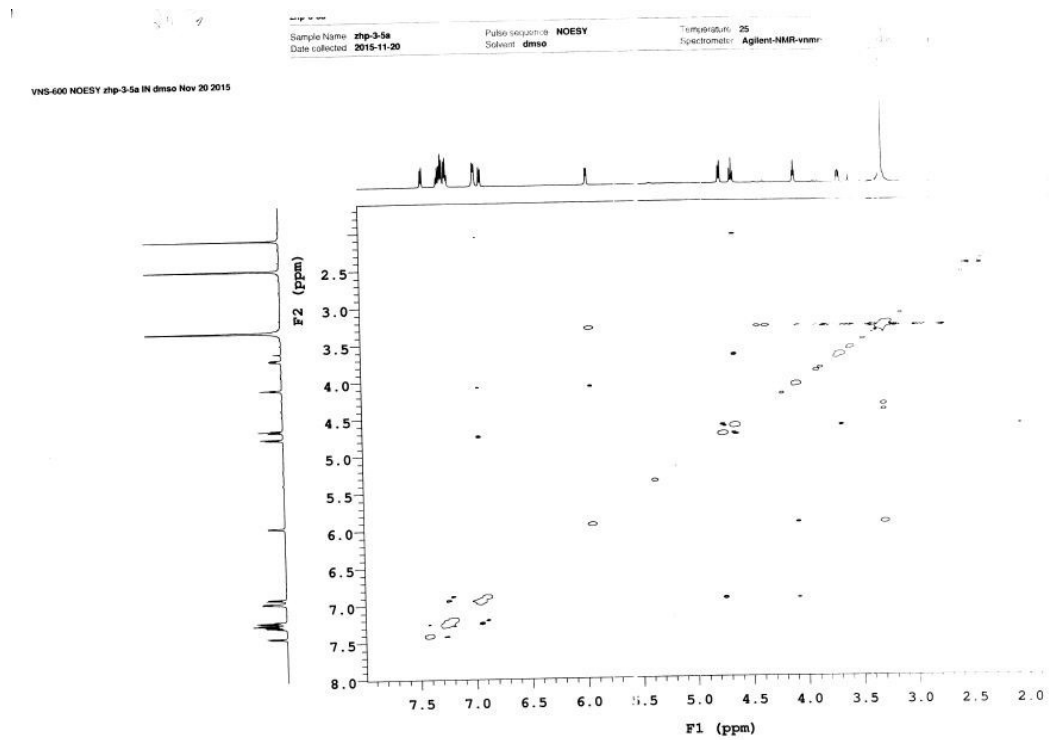

# S44. The HRESIMS Spectrum of compound 3

## Qualitative Analysis Report

**Data Filename** 2015041501.d      **Sample Name** ZHP-3-5f  
**Sample Type** Sample                      **Position** PL-05  
**Instrument Name** Instrument 1              **User Name**  
**Acq Method** TEST LCMS.m              **IRM Calibration Status** Success  
**DA Method** TEST LCMS.m              **Comment**

### User Chromatograms

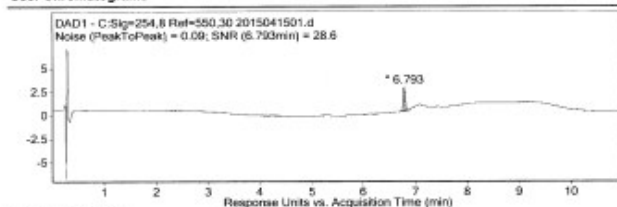

### Integration Peak List

| Peak | Start | RT    | End   | Height | Area | Area % | Signal To Noise |
|------|-------|-------|-------|--------|------|--------|-----------------|
| 1    | 6.731 | 6.793 | 6.909 | 2.5    | 7.36 | 100    | 28.6            |

**Fragmentor Voltage** 120      **Collision Energy** 0      **Ionization Mode** ESI

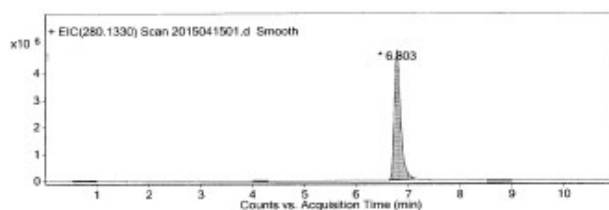

### Integration Peak List

| Peak | Start | RT    | End   | Height  | Area     | Area % | Signal To Noise |
|------|-------|-------|-------|---------|----------|--------|-----------------|
| 1    | 6.642 | 6.803 | 7.157 | 4831693 | 41828871 | 100    | Infinity        |

### User Spectra

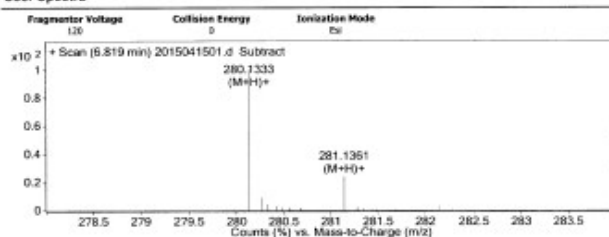

### MS Formula Results: + Scan (6.819 min) Sub (2015041501.d)

| m/z      | Ion                | Formula                                                       | Abundance |
|----------|--------------------|---------------------------------------------------------------|-----------|
| 280.1333 | (M+H) <sup>+</sup> | C <sub>18</sub> H <sub>18</sub> N <sub>2</sub> O <sub>2</sub> | 5506573.5 |

  

| Best | Formula (M)                                                   | Ion Formula                                                   | Score | Cross Sco | Mass    | Calc Mass | Calc m/z | Diff (ppm) | Abs Diff (ppm) | Mass Match | Abund Match | Spacing Match | DBE |
|------|---------------------------------------------------------------|---------------------------------------------------------------|-------|-----------|---------|-----------|----------|------------|----------------|------------|-------------|---------------|-----|
| ✓    | C <sub>18</sub> H <sub>17</sub> N <sub>2</sub> O <sub>2</sub> | C <sub>18</sub> H <sub>18</sub> N <sub>2</sub> O <sub>2</sub> | 99.47 |           | 279.126 | 279.1259  | 280.1332 | -0.4       | 0.4            | 100        | 98.23       | 99.91         | 11  |

S45. The  $^1\text{H}$  NMR Spectrum (600 MHz,  $\text{CDCl}_3$ ) of compound 3aa

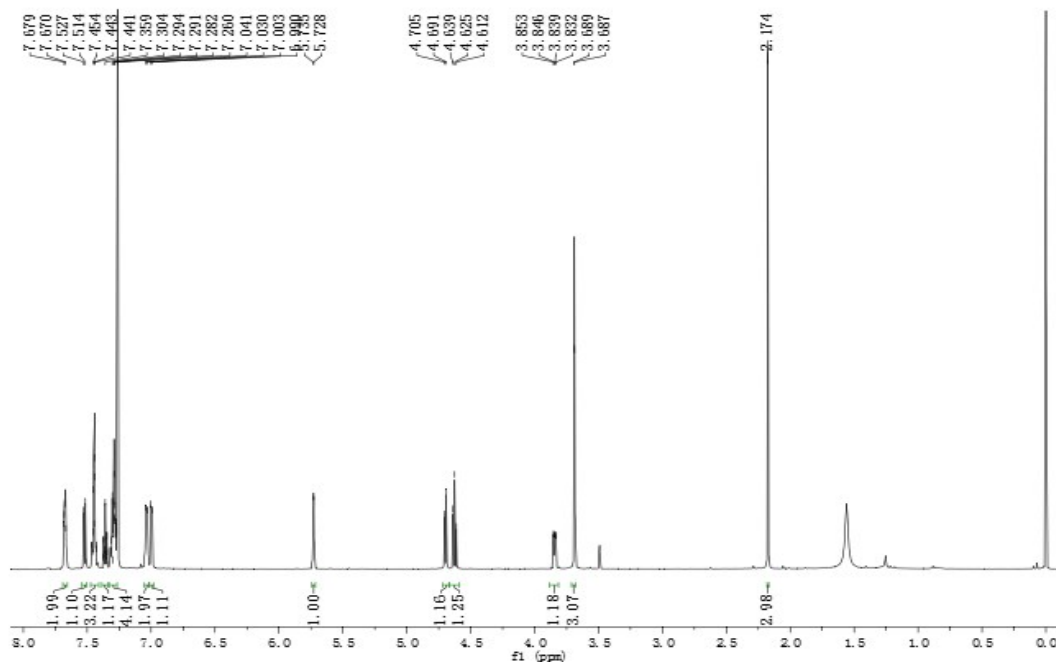

S46. The  $^1\text{H}$  NMR Spectrum (600 MHz,  $\text{CDCl}_3$ ) of compound 3ab

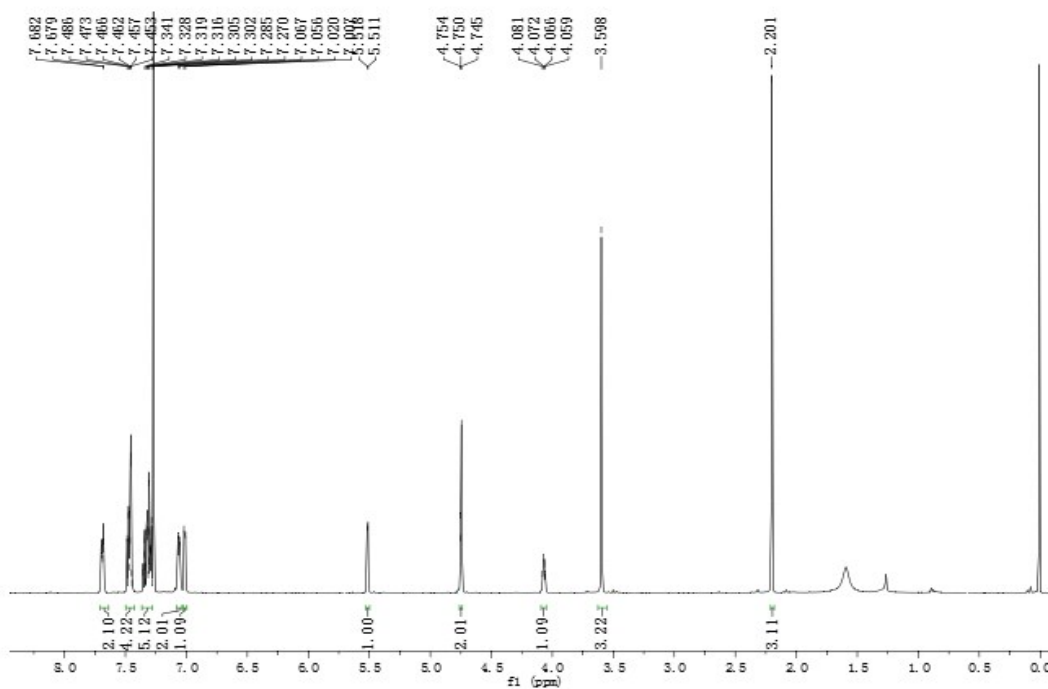

S47. The Calculated ECD spectra of (3*S*, 4*R*, 5*S*, 6*S*), (3*R*, 4*S*, 5*R*, 6*R*)-3 and the experimental ECD spectrum of 3a and 3b

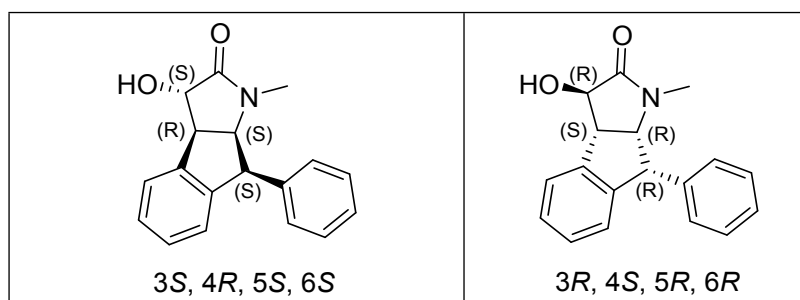

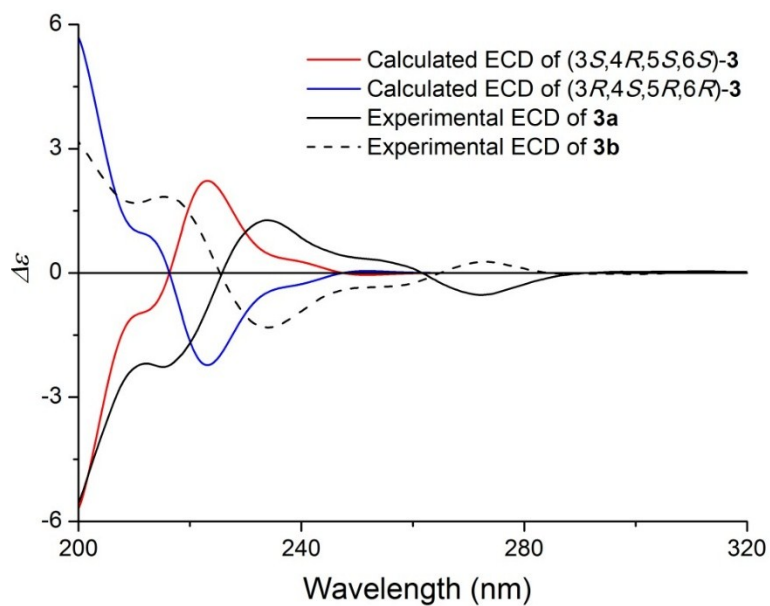

### S48. The IR Spectrum of compound 3a

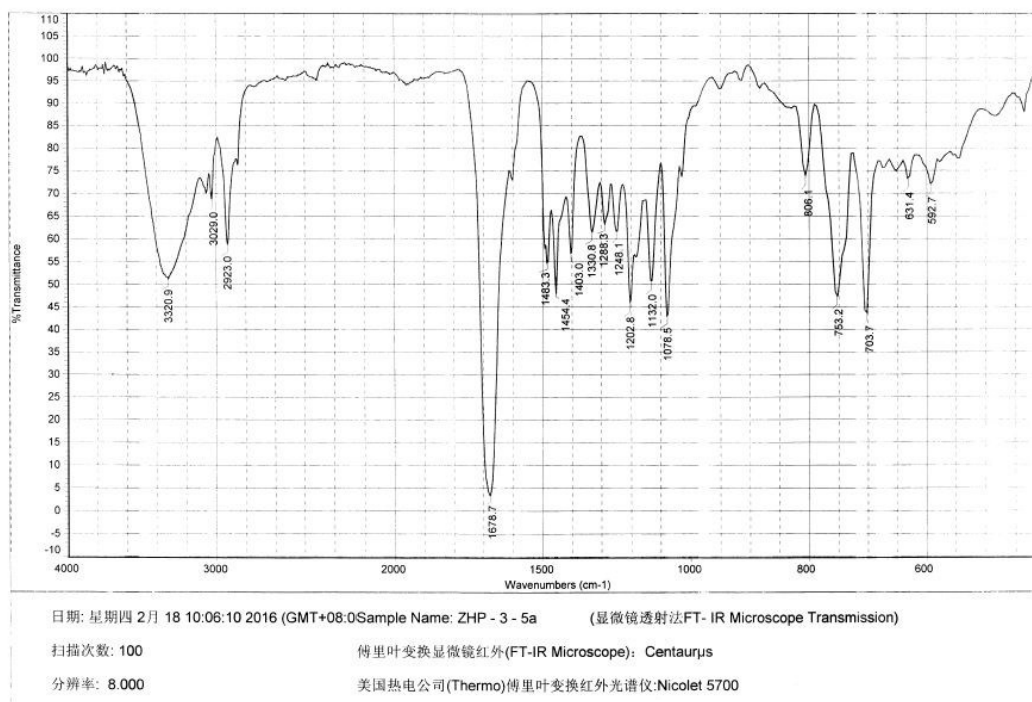

## S49. The IR Spectrum of compound 3b

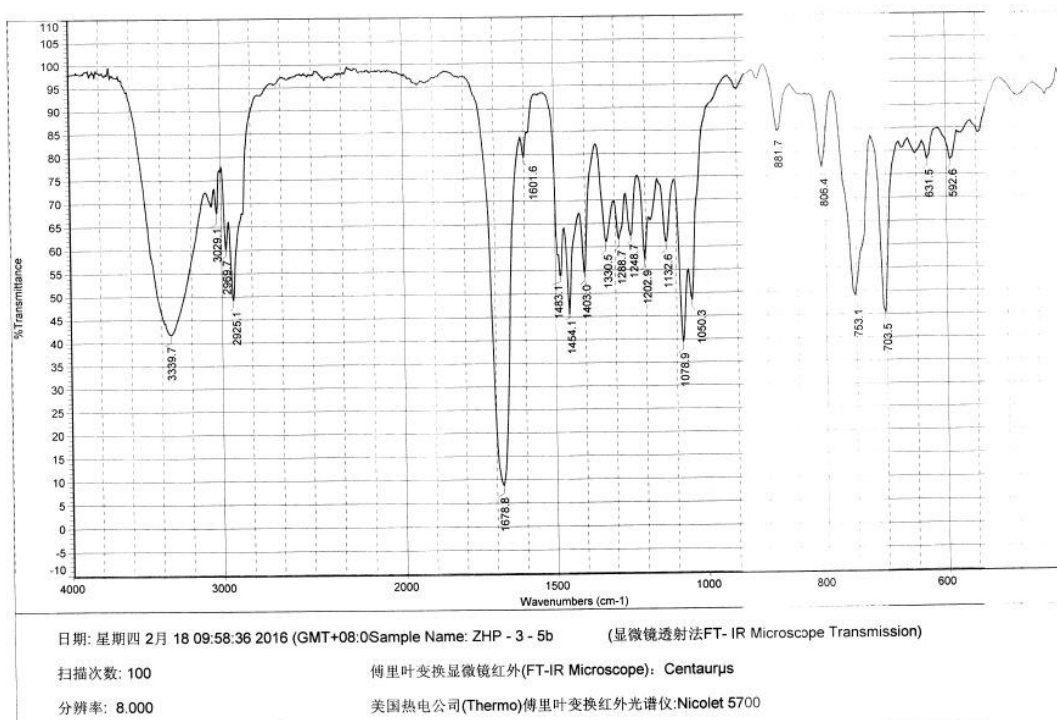



S50. The  $^1\text{H}$  NMR Spectrum (600 MHz,  $\text{DMSO-}d_6$ ) of compound 4

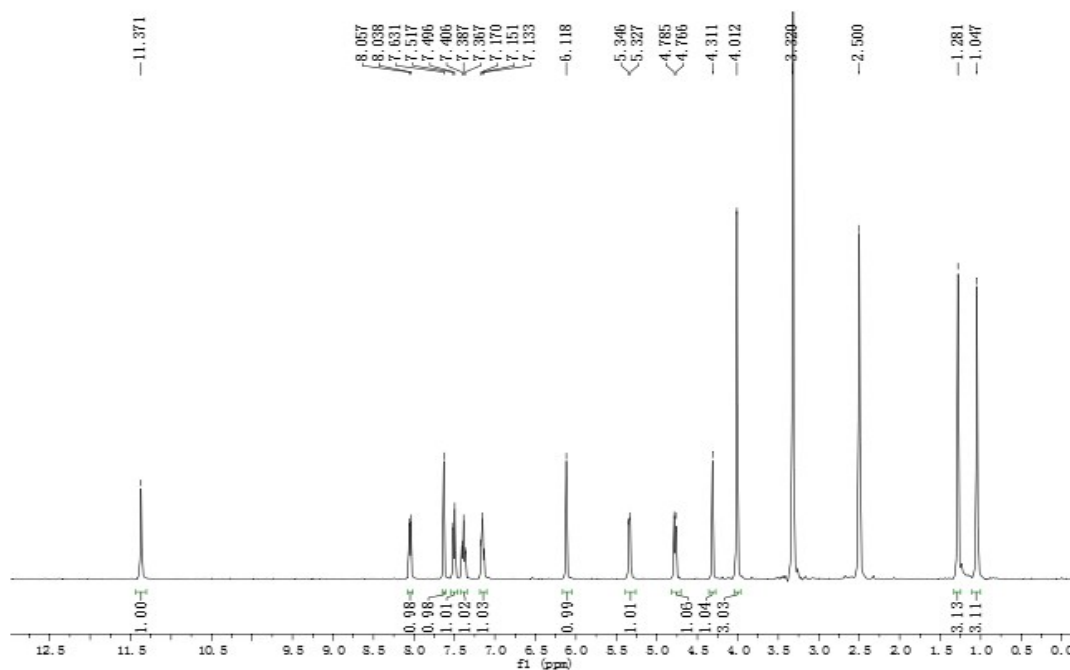

S51. The  $^{13}\text{C}$  NMR Spectrum (150 MHz,  $\text{DMSO-}d_6$ ) of compound 4

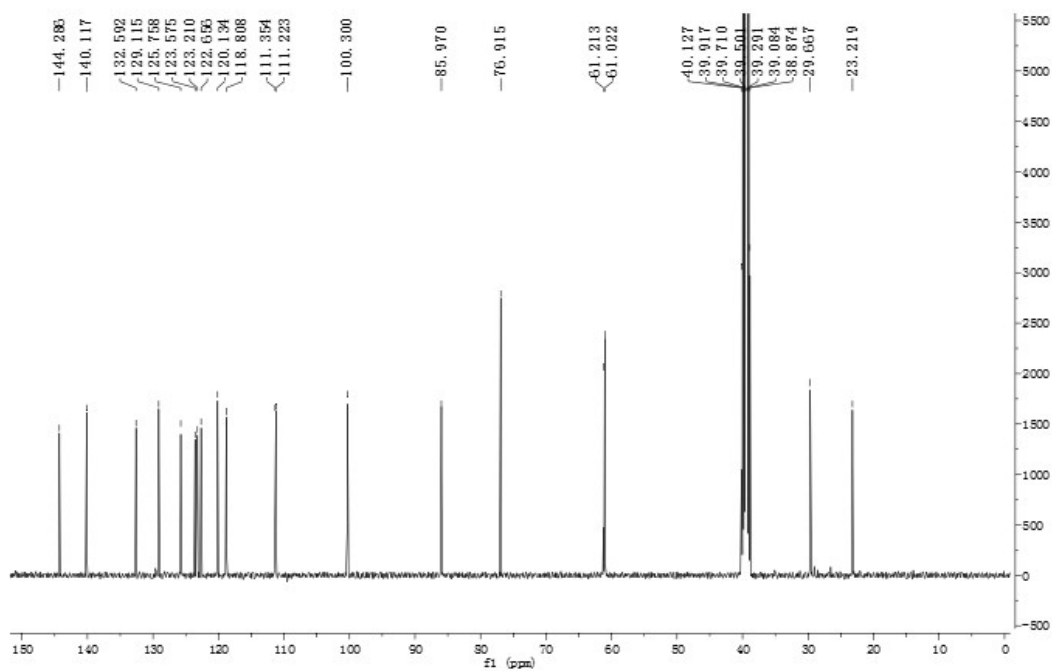

# S52. The HRESIMS Spectrum of compound 4

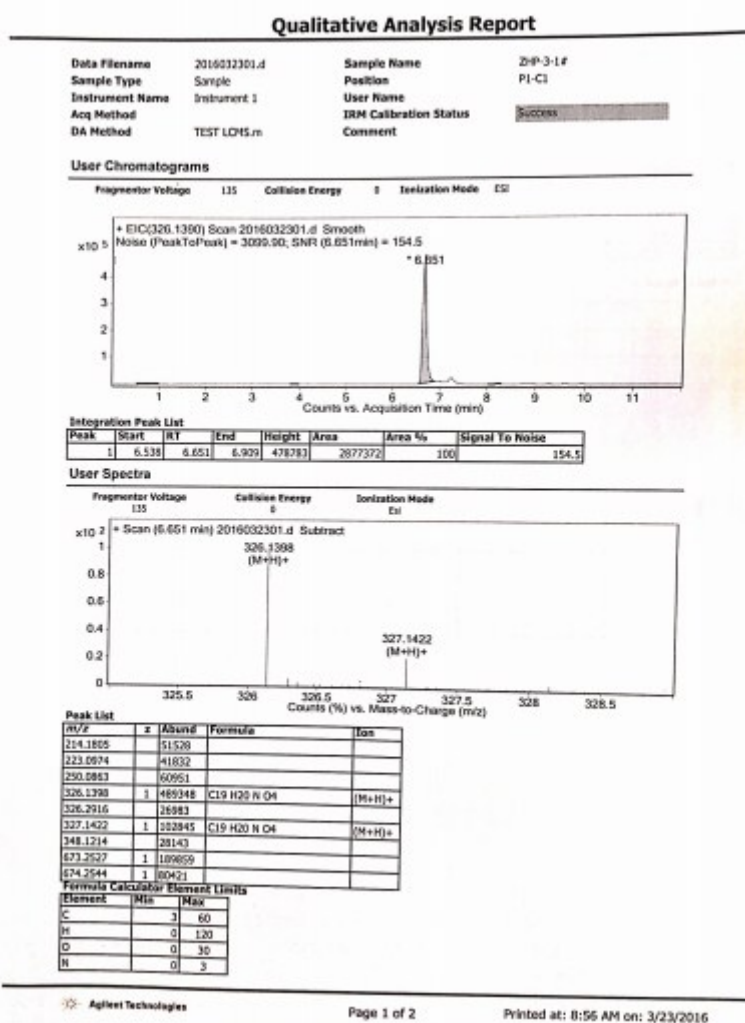

MS Formula Results: + Scan (6.651 min) Sub (2016032301.d)

| m/z      | Ion    | Formula      | Abundance |
|----------|--------|--------------|-----------|
| 326.1398 | (M+H)+ | C19 H20 N O4 | 489347.8  |

  

| Best | Formula (M)       | Ion Formula       | Score | Cross Sec | Mass     | Calc Mass | Calc m/z | Diff (ppm) | Abs Diff (ppm) | Mass Match | Abund Match | Spacing Match | DBE |
|------|-------------------|-------------------|-------|-----------|----------|-----------|----------|------------|----------------|------------|-------------|---------------|-----|
| +    | C19 H19 N O4      | C19 H20 N O4      | 99.78 |           | 325.1325 | 325.1314  | 326.1387 | -3.37      | 3.37           | 99.64      | 99.99       | 99.62         | 11  |
| +    | C18 H23 N O S2    | C18 H24 N O S2    | 96.69 |           | 325.1325 | 325.1318  | 326.1391 | -2.15      | 2.15           | 99.85      | 89.01       | 99.58         | 10  |
| +    | C9 H27 N3 O4 S3   | C9 H28 N3 O4 S3   | 95.5  |           | 325.1325 | 325.1309  | 326.1382 | -4.89      | 4.89           | 99.25      | 86.4        | 98.91         | 1   |
| +    | C13 H25 Cl2 N3 O2 | C13 H26 Cl2 N3 O2 | 73.39 |           | 325.1325 | 325.1324  | 326.1397 | -0.39      | 0.39           | 100        | 7.58        | 99.16         | 2   |

**S53. The Calculated ECD spectra of (1'*R*, 2'*R*, 6'*R*), (1'*S*, 2'*S*, 6'*S*)-isomers and the experimental ECD spectrum of 4a and 4b**

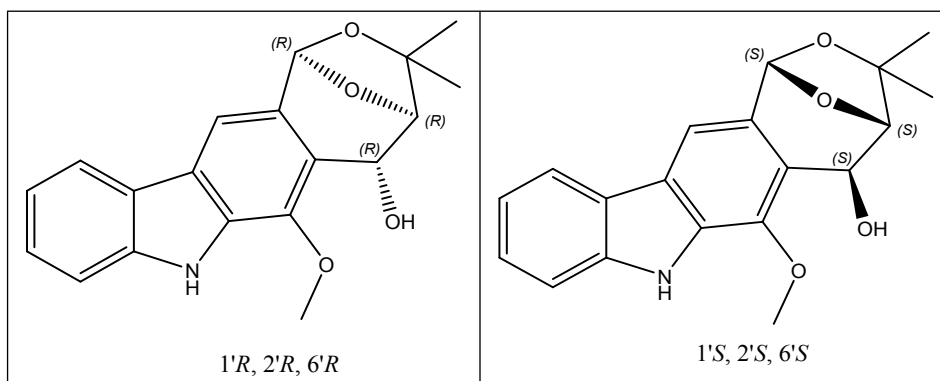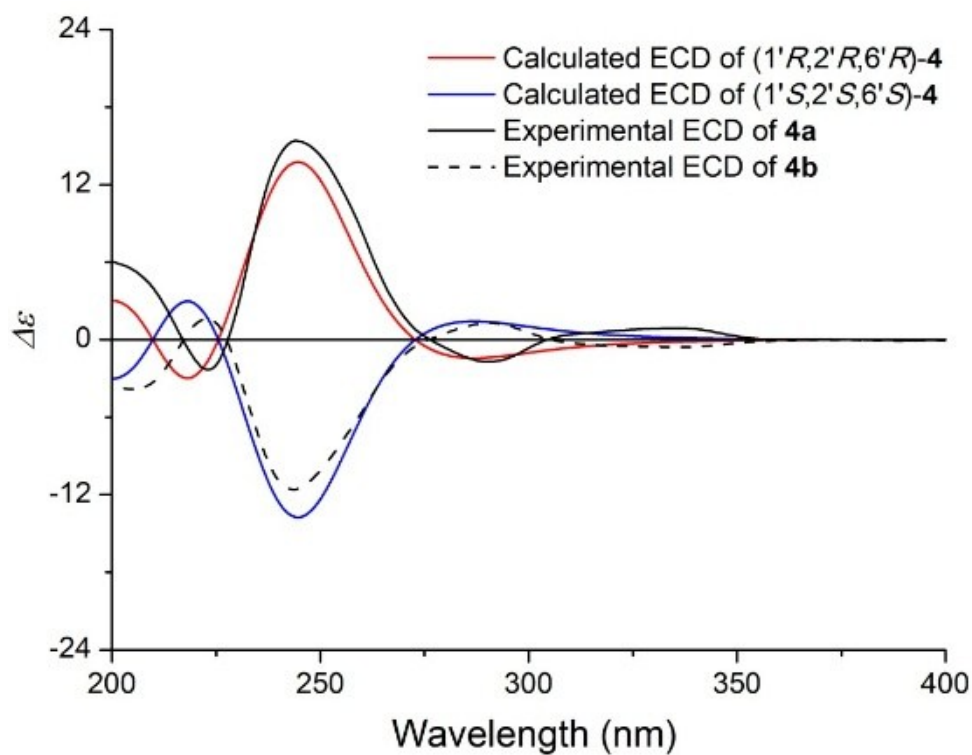

S54. The  $^1\text{H}$  NMR Spectrum (600 MHz,  $\text{DMSO-}d_6$ ) of compound 5

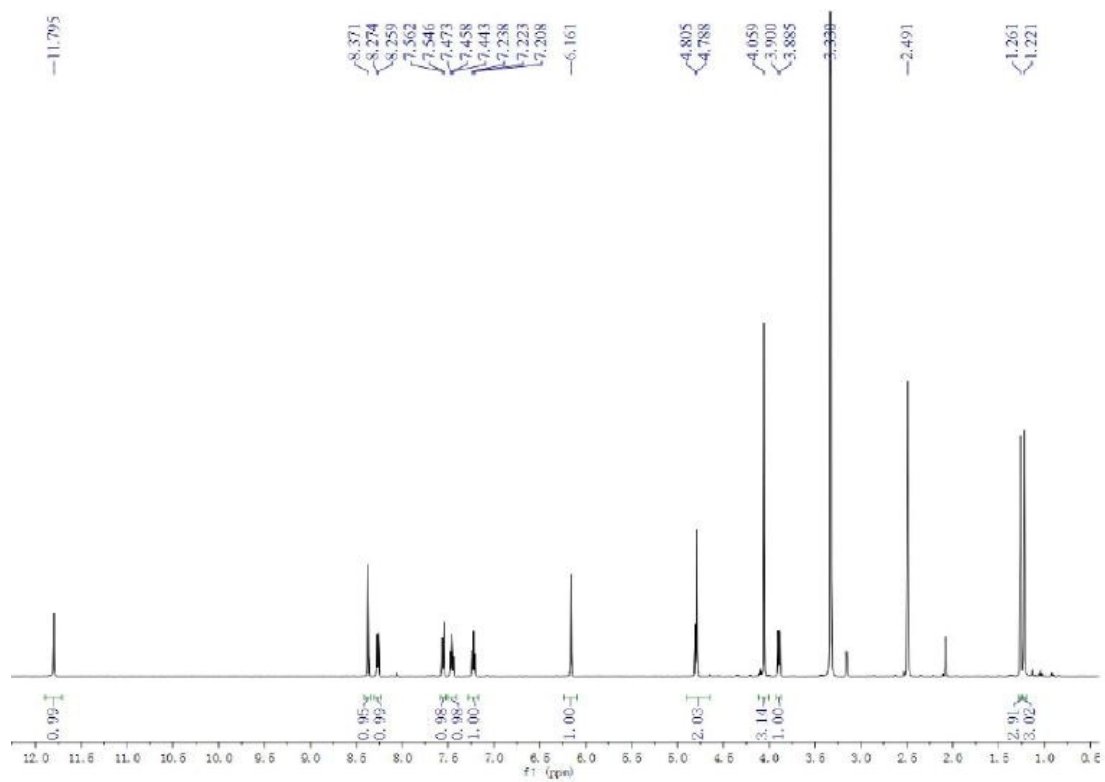

S55. The  $^{13}\text{C}$  NMR Spectrum (150 MHz,  $\text{DMSO-}d_6$ ) of compound 5

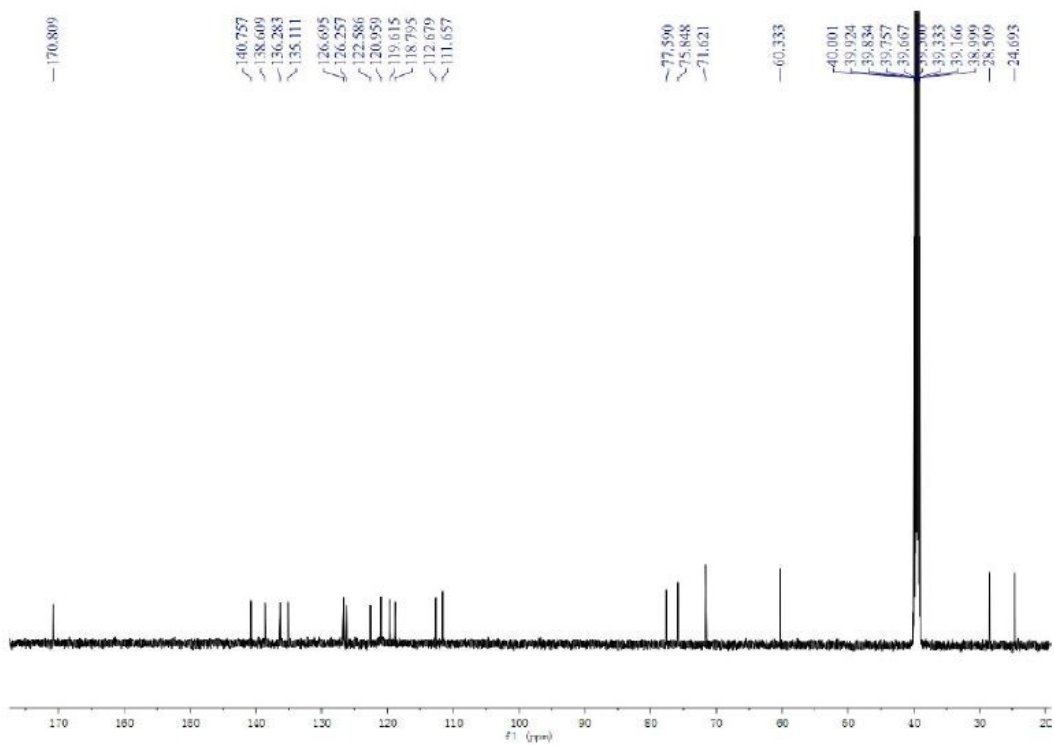

# S56. The HRESIMS Spectrum of compound 5

## Qualitative Analysis Report

**Data Filename:** 2016032302.d      **Sample Name:** ZHP-CLS  
**Sample Type:** Sample                **Position:** PL-C2  
**Instrument Name:** Instrument 1      **User Name:**  
**Acq Method:**                            **IRM Calibration Status:** Success  
**DA Method:** TEST.LCMS.m          **Comment:**

### User Chromatograms

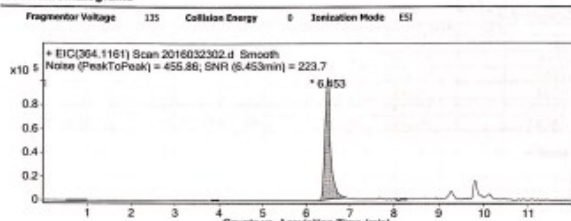

### Integration Peak List

| Peak | Start | RT    | End  | Height | Area   | Area % | Signal To Noise |
|------|-------|-------|------|--------|--------|--------|-----------------|
| 1    | 6.292 | 6.453 | 6.52 | 101962 | 520921 | 100    | 223.7           |

### User Spectra

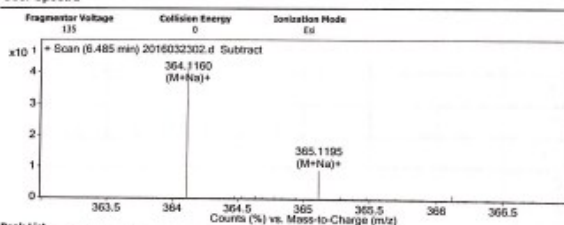

### Peak List

| m/z      | z | Abund  | Formula         | Ion     |
|----------|---|--------|-----------------|---------|
| 252.0546 | 1 | 63196  |                 |         |
| 266.0811 | 1 | 227533 |                 |         |
| 267.0842 | 1 | 39704  |                 |         |
| 324.1231 | 1 | 18831  |                 |         |
| 364.116  | 1 | 95228  | C19 H19 N Na O5 | [M+Na]+ |
| 365.1195 | 1 | 20401  | C19 H19 N Na O5 | [M+Na]+ |
| 380.0904 | 1 | 16856  |                 |         |
| 705.2417 | 1 | 186358 |                 |         |
| 706.2453 | 1 | 76502  |                 |         |
| 707.2466 | 1 | 20237  |                 |         |

### Formula Calculator Element Limits

| Element | Min | Max |
|---------|-----|-----|
| C       | 3   | 60  |
| H       | 0   | 120 |
| O       | 0   | 30  |

### MS Formula Results: + Scan (6.485 min) Sub (2016032302.d)

| m/z     | Ion     | Formula         | Abundance |
|---------|---------|-----------------|-----------|
| 364.116 | (M+Na)+ | C19 H19 N Na O5 | 95228     |

  

| Best | Formula (M)       | Ion Formula          | Score | Cross Soo | Mass     | Calc Mass | Calc m/z | Diff (ppm) | Abn Diff (ppm) | Mass Match | Abund Match | Spacing Match | DBE |
|------|-------------------|----------------------|-------|-----------|----------|-----------|----------|------------|----------------|------------|-------------|---------------|-----|
| ✓    | C19 H19 N O5      | C19 H19 N Na O5      | 99.96 |           | 341.1268 | 341.1263  | 364.1155 | -1.37      | 1.37           | 99.95      | 99.97       | 99.97         | 11  |
| ☐    | C10 H23 N3 O8 Si  | C10 H23 N3 Na O8 Si  | 98.53 |           | 341.1268 | 341.1254  | 364.1147 | -3.99      | 3.99           | 99.55      | 96.13       | 99.36         | 2   |
| ☐    | C18 H23 N O2 Si2  | C18 H23 N Na O2 Si2  | 96.82 |           | 341.1268 | 341.1267  | 364.116  | -0.2       | 0.2            | 108        | 89.39       | 99.39         | 13  |
| ☐    | C8 H27 N3 O5 Si3  | C9 H27 N3 Na O5 Si3  | 95.71 |           | 341.1268 | 341.1259  | 364.1151 | -2.82      | 2.82           | 99.77      | 86.66       | 98.42         | 1   |
| ☐    | C13 H25 C2 N3 O3  | C-3 H25 C2 N3 Na O3  | 73.04 |           | 341.1268 | 341.1273  | 364.1165 | 1.48       | 1.48           | 99.94      | 6.19        | 99.46         | 2   |
| ☐    | C12 H29 C2 N3 Si2 | C12 H29 C2 N3 Na Si2 | 72.94 |           | 341.1268 | 341.1277  | 364.1169 | 2.64       | 2.64           | 99.8       | 6.63        | 98.77         | 1   |

S57. The Calculated ECD spectra of (1'*R*, 2'*R*), (1'*S*, 2'*S*)-5 and the experimental

ECD spectrum of 5a and 5b

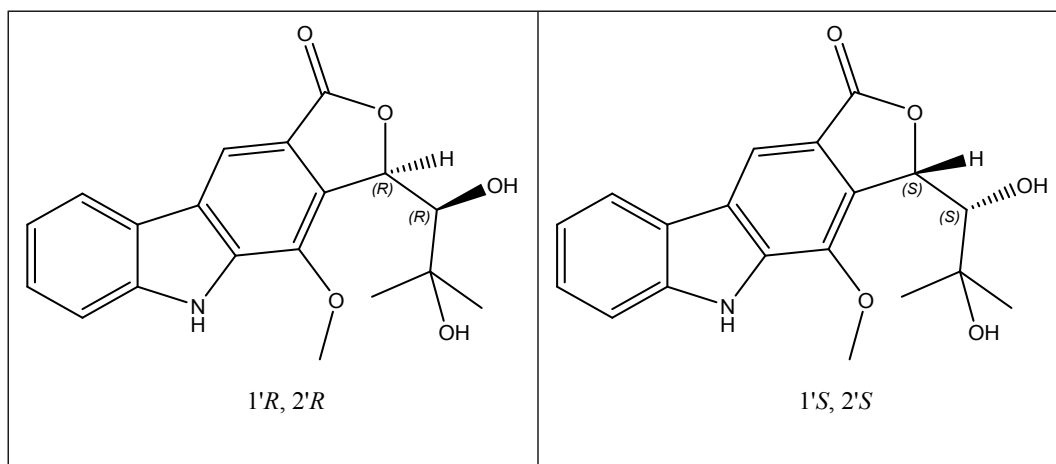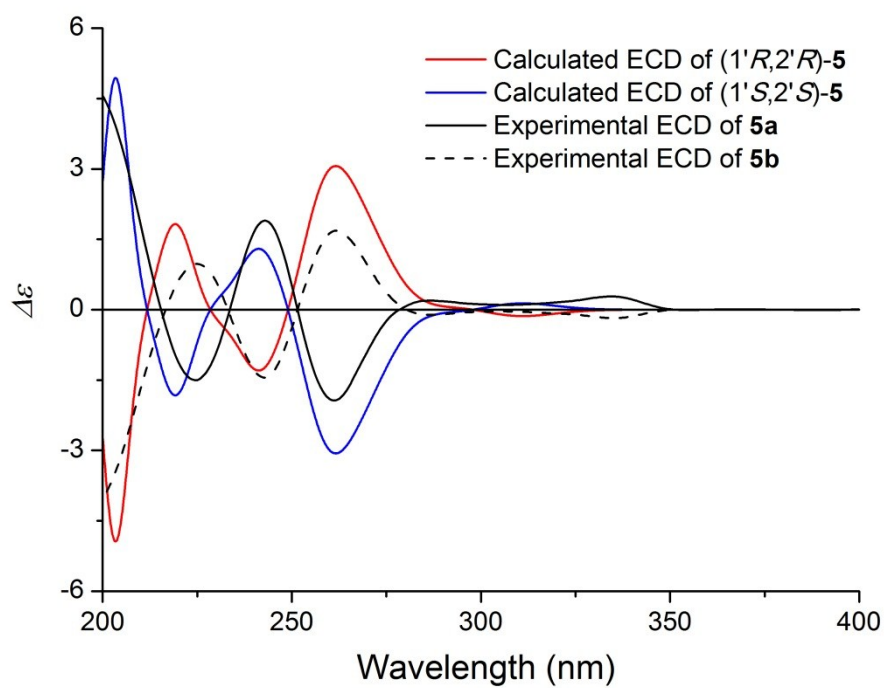

Supplement: c7ra06753d1.pdf [file c7ra06753d1.pdf]
